# Temporal Chunking as a Mechanism for Unsupervised Learning of Task-Sets

Flora Bouchacourt<sup>1,2</sup>

Stefano Palminteri<sup>1,2,3</sup>

Etienne Koechlin<sup>1,2</sup>

Srdjan Ostojic<sup>1,2,3,\*</sup>

<sup>1</sup>Laboratoire de Neurosciences Cognitives et Computationnelles,

Institut National de la Sante et de la Recherche Medicale, Paris, France

<sup>2</sup>Departement d'Etudes Cognitives, Ecole Normale Superieure, Paris, France

<sup>3</sup>Institut d'Etudes de la Cognition,

Universite de Recherche Paris Sciences et Lettres, Paris, France

\* corresponding author (srdjan.ostojic@ens.fr)

## Abstract

Depending on environmental demands, humans can learn and exploit multiple concurrent sets of stimulus-response associations. Mechanisms underlying the learning of such task-sets remain unknown. Here we investigate the hypothesis that task-set learning relies on unsupervised chunking of stimulus-response associations that occur in temporal proximity. We examine behavioral and neural data from a task-set learning experiment using a network model. We first show that task-set learning can be achieved provided the timescale of chunking is slower than the timescale of stimulus-response learning. Fitting the model to behavioral data confirmed this expectation and led to specific predictions linking chunking and task-set retrieval that were borne out by behavioral performance and reaction times. Comparing the model activity with BOLD signal allowed us to identify neural correlates of task-set retrieval in a functional network involving ventral and dorsal prefrontal cortex, with the dorsal system preferentially engaged when retrievals are used to improve performance.

## Keywords

task-set learning, Hebbian plasticity, cognitive control, mixed selectivity, computational model.

## Introduction

2 Synaptic plasticity is believed to constitute the neurobiological basis of learning and  
memory. Changes of synaptic strength based on the activity of pre- and post-synaptic  
4 neurons were first postulated by Hebb [Hebb, 1949] and later confirmed in electrophysio-  
logical experiments [Frégnaç et al., 1988; Levy and Steward, 1983; Lisman, 2003; Lynch  
6 et al., 1977; Malenka and Nicoll, 1999]. Such synaptic changes in turn modify the ac-  
tivity in the network as well as the response to incoming stimuli, and can implement  
8 stimulus-action learning [Bathellier et al., 2013; Fusi et al., 2007; Reynolds et al., 2001;  
Riout-Pedotti et al., 2000; Rumpel et al., 2005; Schultz and Dickinson, 2000; Xiong et al.,  
10 2015]. Understanding how synaptic changes at individual synapses are related to learn-  
ing in behaving animals remains however a daunting challenge, especially for complex  
12 cognitive tasks that go beyond simple stimulus-response associations.

Depending on environmental demands, humans engaged in a given task are capable  
14 of learning and exploiting multiple concurrent strategies. For instance, in the classical  
Stroop task [MacLeod, 1991; Stroop, 1935], an identical stimulus like a colored word leads

16 to different responses depending on whether the current requirement is to read the word  
or identify its color. Human subjects are able to learn to flexibly switch between these two  
18 different stimulus-response associations, often called task-sets [Sakai, 2008]. Studies of  
task-sets learning predominantly rely on abstract models that describe behavioral learning  
20 without any physiological constraint [Botvinick et al., 2009; Collins and Koechlin, 2012;  
Collins and Frank, 2013; Daw et al., 2005, 2011; Dayan and Daw, 2008; Franklin and  
22 Frank, 2018; Russek et al., 2017]. While these models are able to capture computational  
aspects of behavior, and correlate them with physiological measurements [Daw et al.,  
24 2011; Donoso et al., 2014; Koechlin and Hyafil, 2007; Niv, 2009; Wilson et al., 2014],  
understanding the underlying biophysical mechanisms is an open issue.

26 One hypothesis [Rigotti et al., 2010b] states that learning of task-sets, and more gener-  
ally rule-based behavior, relies on unsupervised learning of temporal contiguity between  
28 events. Events that occur repeatedly after each other are automatically associated as  
demonstrated in classical conditioning experiments [Hawkins et al., 1983; Kahana, 1996;  
30 Rescorla, 1988; Rescorla et al., 1972; Sakai and Miyashita, 1991; Yakovlev et al., 1998]. If  
one thinks of individual stimulus-response associations as abstracted events, temporally  
32 chunking two or more such events effectively corresponds to learning a simple task-set  
or association rule. Hebbian synaptic plasticity naturally leads to unsupervised learning  
34 of temporal contiguity between events [Blumenfeld et al., 2006; Fusi, 2002; Fusi et al.,  
2007; Griniasty et al., 1993; Li and DiCarlo, 2010; Ostojic and Fusi, 2013; Preminger  
36 et al., 2009; Soltani and Wang, 2006; Wallis et al., 1993], and therefore provides a natural  
biological mechanism for learning task-sets [Rigotti et al., 2010b].

38 Here we explore the hypothesis that temporal contiguity is implemented in a neural  
network through simple Hebbian learning. Recurrence enables the network to learn from  
40 its own activity and thus synaptic links are created between events separated in time. If  
the network is composed of hierarchical layers of cells selective to mixtures of stimuli and  
42 responses, task-sets of increasing complexity can be encoded. We test this hypothesis in  
the context of human decision-making. To this end, we consider a specific experimental  
44 task [Collins and Koechlin, 2012] where subjects have to learn multiple task-sets by  
merging associations between a unique set of stimuli and responses. We show that in  
46 order to encode these concurrent task-sets efficiently, plasticity between cells selective to  
a mixture of both a stimulus and a response has to be slower than plasticity between cells  
48 selective to either a stimulus or a response.

Fitting this model to behavior allows us to make specific predictions based on the  
50 hypothesis that task-set learning relies on temporal chunking of events. One prediction  
pertains to the case when a task-set is retrieved correctly, an another one to the case  
52 when this retrieval is maladaptive. We show that these predictions are borne-out by the

behavioral data at the level of individual subjects. Moreover, we show that the time-series of the inference signal predicting task-set retrieval in the model correlates with BOLD signal recorded from fMRI [Donoso et al., 2014] in a functional network engaging medial and dorsal prefrontal cortex. Dorsomedial and dorsolateral prefrontal cortex are engaged specifically when the retrieval of a task-set is used for optimal performance. On the contrary, ventromedial prefrontal cortex is engaged negatively, irrespective of a possible task-set retrieval. This is equivalent to tracking the compatibility, when a reward is received, between the network layer encoding task-sets, and the network layer encoding one-to-one stimulus-response associations.

These results show that simple Hebbian mechanisms and temporal contiguity may parsimoniously explain the learning of complex, rule-based behavior.

## Results

### Behavioral evidence for task-set-driven behavior

To investigate the mechanisms for task-set learning, we examined a specific experiment performed by 22 human subjects (Experiment 1 [Collins and Koechlin, 2012], see Materials and Methods). In each trial, the subjects had to associate a visual stimulus with a motor response (Fig. 1a). The subjects needed to learn the correct associations based on a feedback signal, which was misleading in 10% of the trials (see Methods). The set of correct stimulus-response associations, which we will denote as *task-set* in the following, was fixed during a block of trials of random length (called an *episode*), and changed repeatedly to a non-overlapping set without explicit indication. As the feedback was not fully reliable, the subjects could not directly infer the task-set changes from the feedback on a single trial, but needed to integrate information.

The subjects' behavior was compared between an *open-ended session*, in which the valid task-set was different in each episode, and a *recurrent session* in which only three task-sets appeared repeatedly. In the open-ended session, as each task-set was seen only once, a correct response to one stimulus bore only minimal information about the correct responses to the other stimuli (the responses to the three stimuli had to be different). In contrast, in the recurrent session, a correct response to a given stimulus fully predicted the correct responses to the other stimuli. Learning full task-sets rather than individual associations therefore allowed subjects to increase their performance.

Behavioral data indicated that beyond individual stimulus-response associations, subjects indeed learned task-sets in the recurrent session [Collins and Koechlin, 2012]. Additional evidence in that direction is displayed in Fig. 1b, where we show the proportion

of correct responses to stimuli seen for the first time after the first correct response in an  
88 episode. This quantity was determined for the last third of the session, when the subjects  
had already experienced several times the three re-occurring task-sets within the recur-  
90 rent session. If the subjects had perfectly learned the task-sets, they could directly infer  
the correct response to the newly seen stimulus from a single correct response to another  
92 stimulus. The data shows that indeed some subjects perfectly learned full task-sets, so  
that their performance is maximal after the first correct trial. The performance averaged  
94 over all subjects was significantly higher in the recurrent session compared to the open-  
ended session (T-test on related samples, second stimulus:  $0.53 \pm 0.05$  vs  $0.39 \pm 0.04$ ,  
96  $t=2.1$ ,  $p=0.049$ ; third stimulus:  $0.65 \pm 0.05$  vs  $0.46 \pm 0.03$ ,  $t=3.1$ ,  $p=0.0049$ ), demonstrat-  
ing that subjects exploited information from the correct response to a given stimulus to  
98 infer the correct response to other stimuli. An important variability was however ob-  
served among subjects, as most of them did not learn task-sets perfectly, and some not  
100 at all (a point we return to later).

An additional observation consistent with task-set learning was that subjects do not  
102 modify their behavior following a misleading noisy feedback occurring late in an episode  
(Fig. 1c, recurrent session:  $0.94 \pm 0.01$  before,  $0.94 \pm 0.01$  after,  $t=0.25$ ,  $p=0.80$  ; open-  
104 ended session  $0.94 \pm 0.01$  before,  $0.93 \pm 0.01$  after,  $t=0.68$ ,  $p=0.50$ ). An isolated misleading  
negative feedback after extensive learning in an episode should be ignored because incon-  
106 sistent with the current task-set. A switch to another task-set or simply a change in a  
single stimulus-response association would be detrimental to performance. This negative  
108 feedback is indeed ignored by the subjects, indicating again they learn sets rather than  
individual stimulus-response associations.

## 110 **A network model for learning task-sets by chunking stimulus- response pairs**

112 To examine the hypothesis that task-set-driven behavior emerges from unsupervised  
chunking of stimulus-response pairs, we studied a neurally-inspired network model (Fig. 1d),  
114 that built on previous modeling studies of a trace conditioning task in monkeys [Fusi et al.,  
2007; Rigotti et al., 2010b]. The model consisted of two subnetworks, which we refer to  
116 as the Associative Network (AN) and the Task-set Network (TN). The associative net-  
work is a simplified version of a neural decision-making network [Fusi et al., 2007; Wang,  
118 2002; Wong and Wang, 2006]. It consists of a set of stimulus-selective populations and a  
set of action-selective populations. The stimulus-action associations are learned through  
120 reward-modulated plasticity on the synapses between the two sets of populations [Fusi  
et al., 2007].

122 The task-set network consists of neural populations that display mixed-selectivity to  
conjunctions of stimuli and actions [Rigotti et al., 2010b, 2013]. For instance, if the  
124 associative network generates the action  $A_2$  in response to the stimulus  $S_1$ , the corre-  
sponding population  $S_1A_2$  is activated in the task-set network. Such mixed-selectivity  
126 response can be implemented through random projections from the associative network  
to the task-set network [Lindsay et al., 2017; Rigotti et al., 2010a], which for simplicity  
128 we don't explicitly include in the model. Synapses between neural populations in the  
task-set network undergo temporal Hebbian learning, i.e. they are modified based on  
130 the successions of stimulus-response pairs produced by the associative network [Ostojic  
and Fusi, 2013; Rigotti et al., 2010b]. If two stimulus-response pairs are produced often  
132 after each other, the synapses between the corresponding mixed-selectivity populations  
in the task-set network are potentiated. When this potentiation exceeds a threshold set  
134 by recurrent inhibition, the two populations are chunked together and systematically  
coactivated when one of the two stimulus-response associations occurs. Thus by means  
136 of temporal chunking, this subnetwork implements a task-set as a merged pattern of  
co-activated populations. This coactivation is communicated to the associative network,  
138 where it biases the stimulus-action associations at the next trial towards those encoded  
by the active populations in the task-set network. This effective *inference signal* helps the  
140 associative network determine the correct response to a stimulus different from the one  
in the current trial, and therefore implements task-set retrieval in the network model.  
142 To keep the model easy to fit and analyze, this inference signal is implemented in a  
simplified manner, by directly modifying the synaptic weights in the associative network  
144 (see Discussion for more realistic physiological implementations). The strength of this  
modification is a parameter in the model that represents the strength of task-set retrieval  
146 (if it is zero, there is no retrieval). We will show that this specific parameter plays a key  
role in accounting for the variability in the subjects behavior.

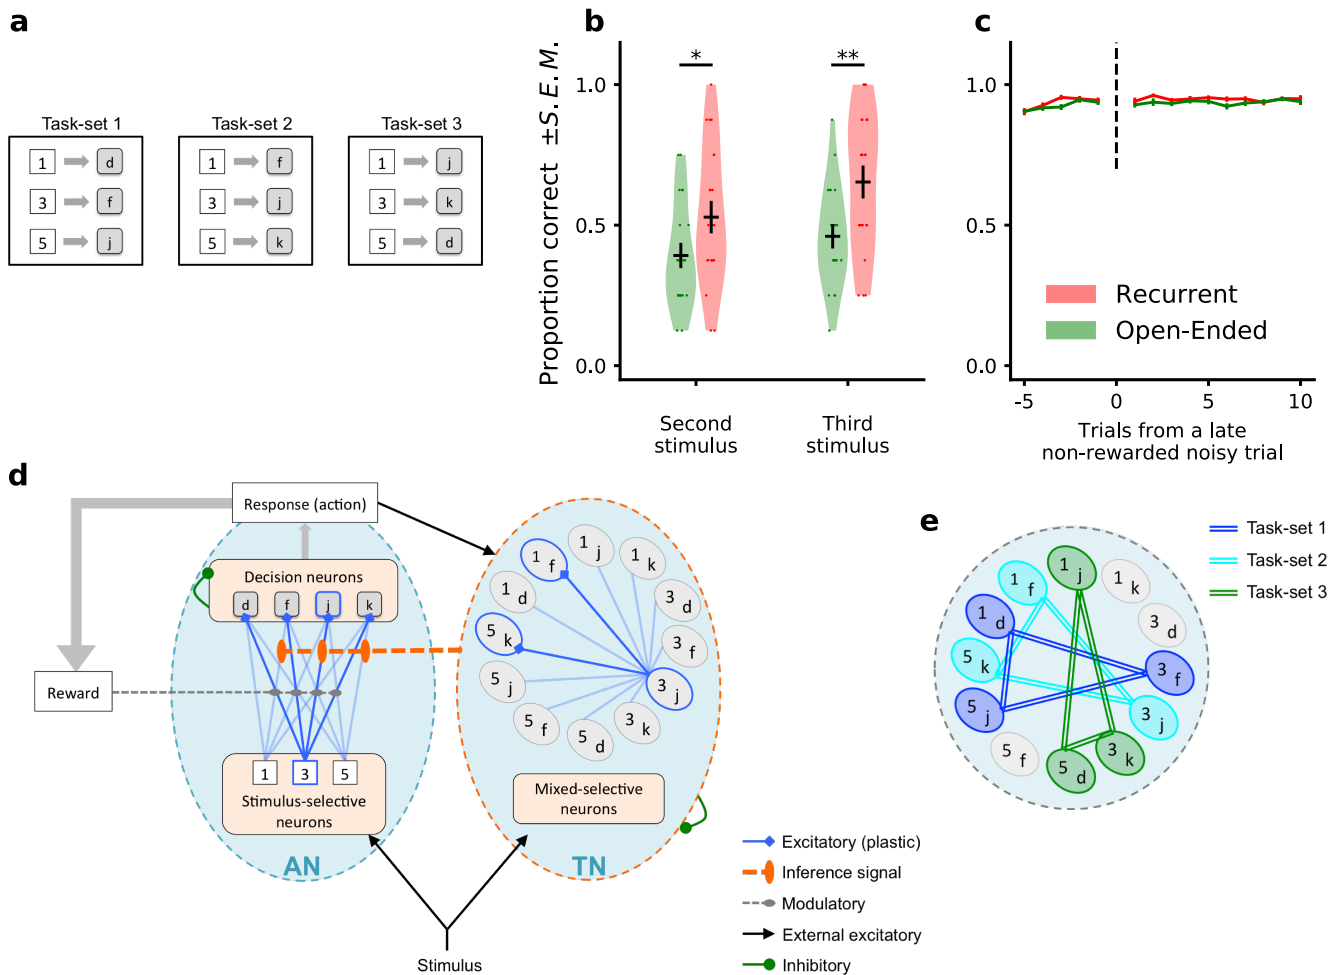

**Figure 1: Task-set learning experiment and subject behavior.** **a**, Schematic of the behavioral task. Subjects had to learn associations between visual stimuli (represented here as  $\{1, 3, 5\}$ ) and motor responses (represented here as  $\{d, f, j, k\}$ ). The set of correct stimulus-response associations, denoted as *task-set*, was fixed during a block of trials of random length. The schematic shows the 3 task-sets used in the recurrent session. The task-sets are non-overlapping from one episode to another in both the recurrent and the open-ended session, meaning that an episode switch produces a change of correct responses for all stimuli. **b**, Proportion of correct responses to stimuli seen for the first time after the first correct response in an episode, during the last third of each experimental session. These newly seen stimuli are labeled *second* or *third* according to their order of appearance. Dots display the average for each subject. Violin plots display the shape of each distribution over subjects (Scott's rule). The black lines outline the mean  $\pm$  s.e.m. **c**, Performance preceding and following a trial with misleading feedback (non-rewarded correct response), at the end of episodes, averaged over all subjects ( $\pm$  s.e.m.). The subjects' performance did not change after a misleading feedback if it occurs at the end of an episode, after being trained on the current task-set. **d**, Illustration of the network model. The associative network (AN) is composed of a set of stimulus-selective populations and a set of action-selective populations. The synaptic weights between the two sets of populations are modified through a reward-modulated, activity-dependent Hebbian plasticity rule. At each trial, an action is selected via a soft and noisy winner-take-all mechanism with respect to the current set of synaptic weights. The task-set network (TN) is composed of neural populations selective to conjunctions of one stimulus and one action. Its activity is driven by the associative network's activity and by its own recurrent connectivity. The sequential activation of neural populations in the task-set network induces the potentiation of the synapses between them. An inference signal from the task-set network to the associative network biases future behavior according to the patterns of activation in the task-set network. **e**, Illustration of the perfect, fully chunked encoding in the task-set network of the 3 non-overlapping task-sets from the recurrent session.

## 148 **Task-set encoding in the network model enables task-set driven** **behavior**

150 The task-set network is in principle able to chunk together stimulus-response pairs that  
occur often after each other. We first show how it enables task-set-driven behavior.  
152 Consider an idealized situation at the end of the recurrent session of the experiment  
where full chunking has taken place, and the pattern of connectivity in the task-set  
154 network directly represents the three task-sets (Fig. 1e). Due to the inference signal from  
the task-set network to the associative network, this pattern of connectivity will directly  
156 influence the responses to incoming stimuli.

The impact of this inference signal is the strongest at an episode change, when the  
158 correct set of stimulus-response associations suddenly shifts (Fig. 2a,e,i). The associative  
network always needs to discover the first correct association progressively by trial and  
160 error, by first depressing the set of stimulus-response synapses in the associative network  
corresponding to the previous task-set, and then progressively potentiating the synapses  
162 corresponding the new set of associations (Fig. 2a). In the absence of task-set inference,  
this learning process happens independently for each stimulus (Fig. 2b,c). In the presence  
164 of the idealized task-set network described above, once the first correct response is made,  
the task-set network produces the inference signal allowing the associative network to  
166 immediately recover the other two correct associations in the new episode (Fig. 2j,k). As  
a consequence, the overall performance is increased (Fig. 2e) due to a sudden increase in  
168 performance following the first correct response (Fig. 2f,g).

A second situation in which the task-set inference strongly manifests itself is the case  
170 of noisy, misleading feedback late in an episode. At that point, the associative network  
has fully learned the correct set of stimulus-response associations, and the performance  
172 has reached asymptotic levels. The network therefore produces mainly correct responses,  
but as on 10% of trials the feedback is misleading, it still occasionally receives negative  
174 reinforcement. In the absence of the task-set network, this negative feedback necessar-  
ily depresses the synapses that correspond to correct associations, leading to a decrease  
176 in performance on the following trials (Fig. 2d,h). In contrast, in the presence of the  
idealized task-set network, the inference signal that biases the behavior towards the cor-  
178 rect task-set is present despite the occasional negative feedback, and therefore allows the  
network to ignore it (Fig. 2d,h,l). The encoding of task-sets in the task-set network pat-  
180 tern of connectivity therefore prevents the transient drop in performance, as seen in the  
experimental data (Fig. 1c).



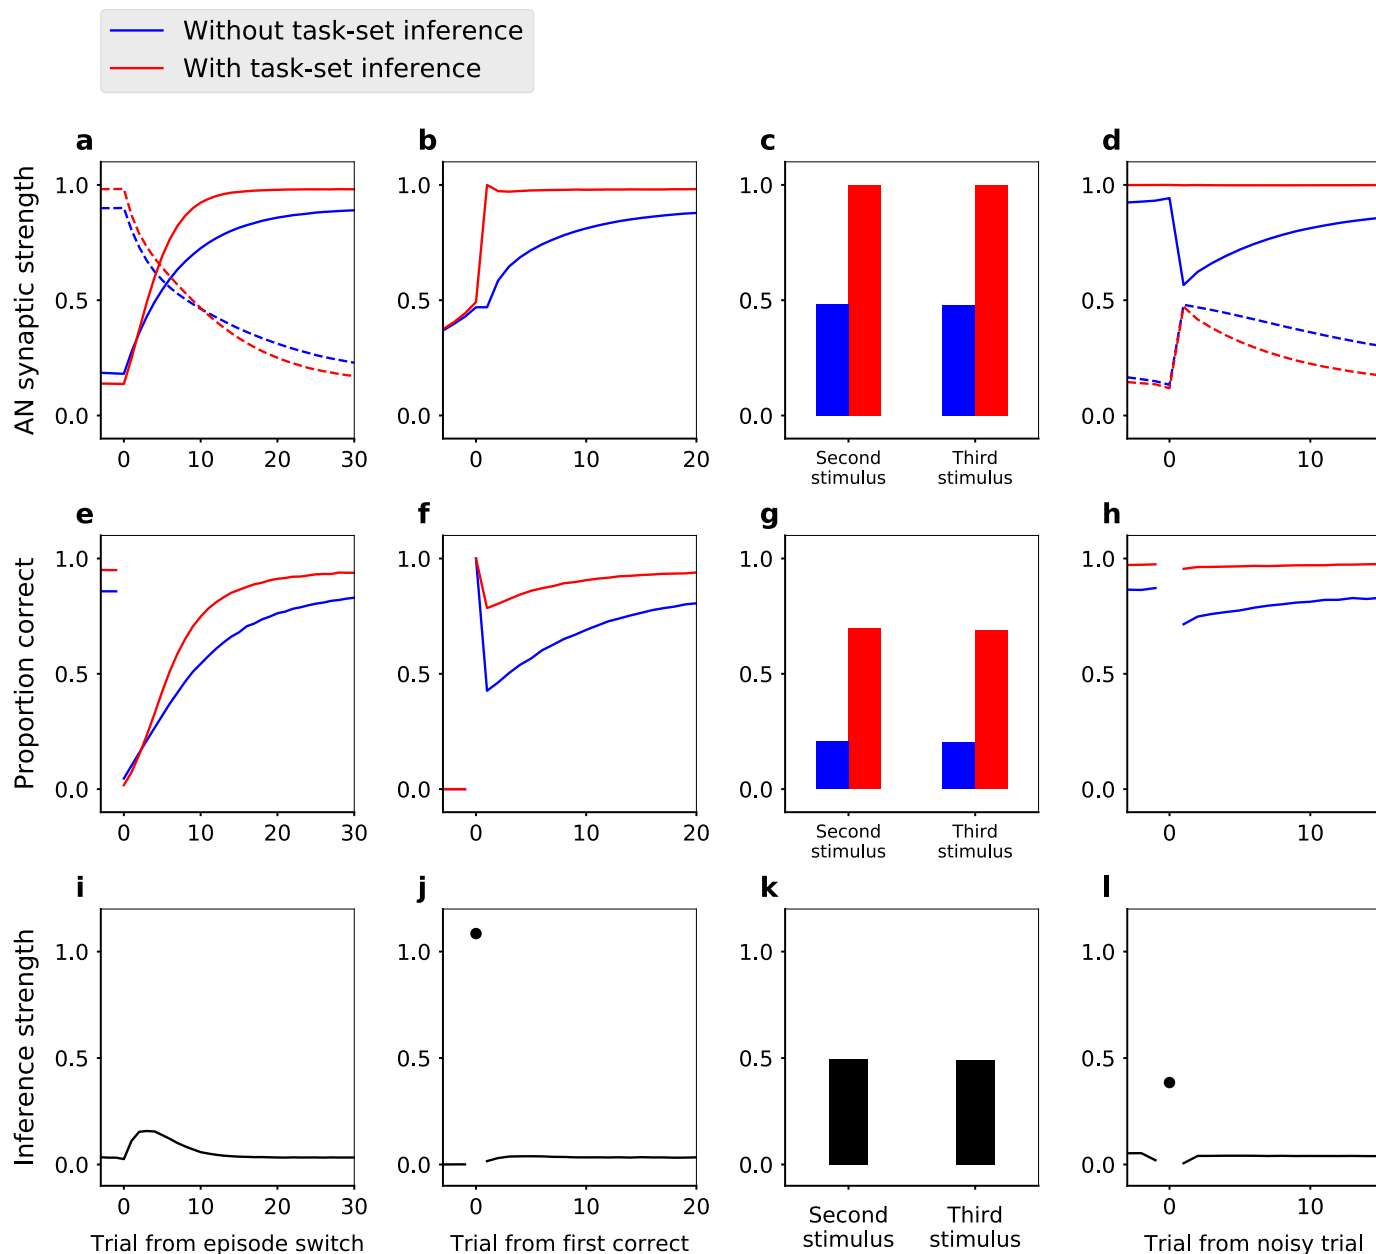

Figure 2: **Task-set driven behavior in the network model with an idealized, perfect encoding of task-sets.** The behavior of the model is compared in presence (red lines) and in absence (blue lines) of the inference signal from the task-set network, that allows task-set retrieval. **a,e,i**, Model dynamics following an episode switch (at trial zero, the correct task-set shifts without explicit indication). **a**, Strengths of synapses in the associative network between neural populations representing the new task-set (solid lines) and the previous task-set (dashed lines). **e**, Performance (proportion of correct responses) following the episode switch. **i**, Mean inference signal strength  $\langle J_{INC} \cdot (1 - J^{AN}) \rangle$  from the task-set network to the associative network. **b,f,j**, Task-set retrieval: same quantities as in (a,e,i) for the stimulus seen for the first time after the first correct response in the new episode, aligned on the first correct response. **c,g,k**, Same quantities as in (a,e,i), for the two stimuli seen for the first time after the first correct response in an episode. As in Fig. 1b, These newly seen stimuli are labeled *second* or *third* relatively to their order of appearance. **d,h,l**, Effect of misleading feedback: same quantities as in (a,e,i), aligned on a misleadingly non-rewarded correct trial at the end of episodes. Average of 5000 sessions of 25 episodes, with 10% of noisy trials. Network parameter values:  $\alpha = 0.4$ ,  $\beta = 7$ ,  $\epsilon = 0$ ,  $J_{INC} = 1$ .

## Speed-accuracy trade-off for learning task-sets in the network model

The idealized encoding described above requires that the task-set network effectively and autonomously learns the correct pattern of connections corresponding to the actual task-sets. We therefore next examined under which conditions synaptic plasticity in the task-set network leads to correct learning, i.e. correct temporal chunking.

Fig. 3a,c,e,g shows a simulation for a parameter set for which learning of task-sets proceeds successfully. At the beginning of the session, all populations within the task-set network are independent as all synaptic weights are below threshold for chunking. As the associative network starts producing correct responses by trial and error, the weights in the task-set network that connect correct stimulus-response pairs get progressively potentiated. While a fraction of them crosses threshold and leads to chunking during the first episode (and therefore starts producing the task-set inference signal), the majority does not, reflecting the fact that the first task-set is not fully learned at the end of the first episode. The potentiation in the task-set network continues over several episodes, and the weights in the task-set network that correspond to co-occurring stimulus-response pairs eventually saturate to an equilibrium value. This equilibrium value is an increasing function of the probability that two stimulus-response pairs follow each other, and of the potentiation rate in the task-set network (see Methods). The equilibrium synaptic weights in the task-set network therefore directly reflect the temporal contiguity between stimulus-response pairs [Ostojic and Fusi, 2013] and thus encode the task-sets. If the equilibrium value is larger than the inhibition threshold in the task-set network, this encoding will lead to the chunking of the activity of different populations and generate the inference signal from the task-set network to the associative network. The inference sets in progressively as the synaptic plasticity in the task-set network advances, and increasingly biases the behavioral output produced by the associative network.

Learning in the task-set network is however strongly susceptible to noise, and need not necessarily converge to the correct representation of task-sets. One important source of noise is the exploratory period following an episode switch, during which the associative network produces a large number of incorrect responses while searching for the correct one. If the potentiation rate in the task-set network is too high, the synaptic weights in the task-set network may track too fast the fluctuating and incorrect stimulus-response associations produced by the associative network, and quickly chunk together pairs of events that do not correspond to a correct task-set (Fig. 3b). Once these events are chunked together, the task-set network sends an incorrect inference signal to the associative network, and generates further incorrect associations (Fig. 3f,h). As the network

218 learns in an unsupervised fashion from its own activity, this in turn leads to more incor-  
219 rect associations in the task-set network. In such a situation, the presence of the task-set  
220 network is at best useless and at worse detrimental to the performance of the network as  
a whole.

222 To determine under which conditions the plasticity in the task-set network leads to  
223 the correct learning of task-sets, we systematically varied the associative and task-set  
224 networks learning rates and compared the performance in the models with and without  
the inference signal from the task-set network. Our results show that the presence of task-  
226 set inference improves the network performance when the task-set network learning rate  
is slower than the associative network learning rate (Fig. 4a). As illustrated in Fig. 3b,f,h,  
228 when learning in the task-set network is too fast, the network tracks noisy associations  
produced by the associative network, because of noise in the experimental feedback or  
230 because of errors made at the transition between episodes. In contrast, slow learning  
allow the task-set network to integrate information over a longer timescale. While in  
232 principle it would be advantageous to learn the task-set structure as quickly as possible,  
the requirement to average-out fluctuations due to erroneous feedback sets an upper-  
234 bound on the learning rate in the task-set network. This is an instance of the classical  
speed-accuracy trade-off.

236 The correct learning of task-sets also depends on the strength of the inference signal.  
While strong inference leads to strong task-set retrieval and potentially large performance  
238 improvement, it also makes the network more sensitive to incorrect chunking in the task-  
set network. Our simulation show that larger inference strengths need to be compensated  
240 for by lower learning rates in the task-set network to produce an improvement in the  
performance (Fig. 4b). This is another manifestation of the speed-accuracy trade-off.

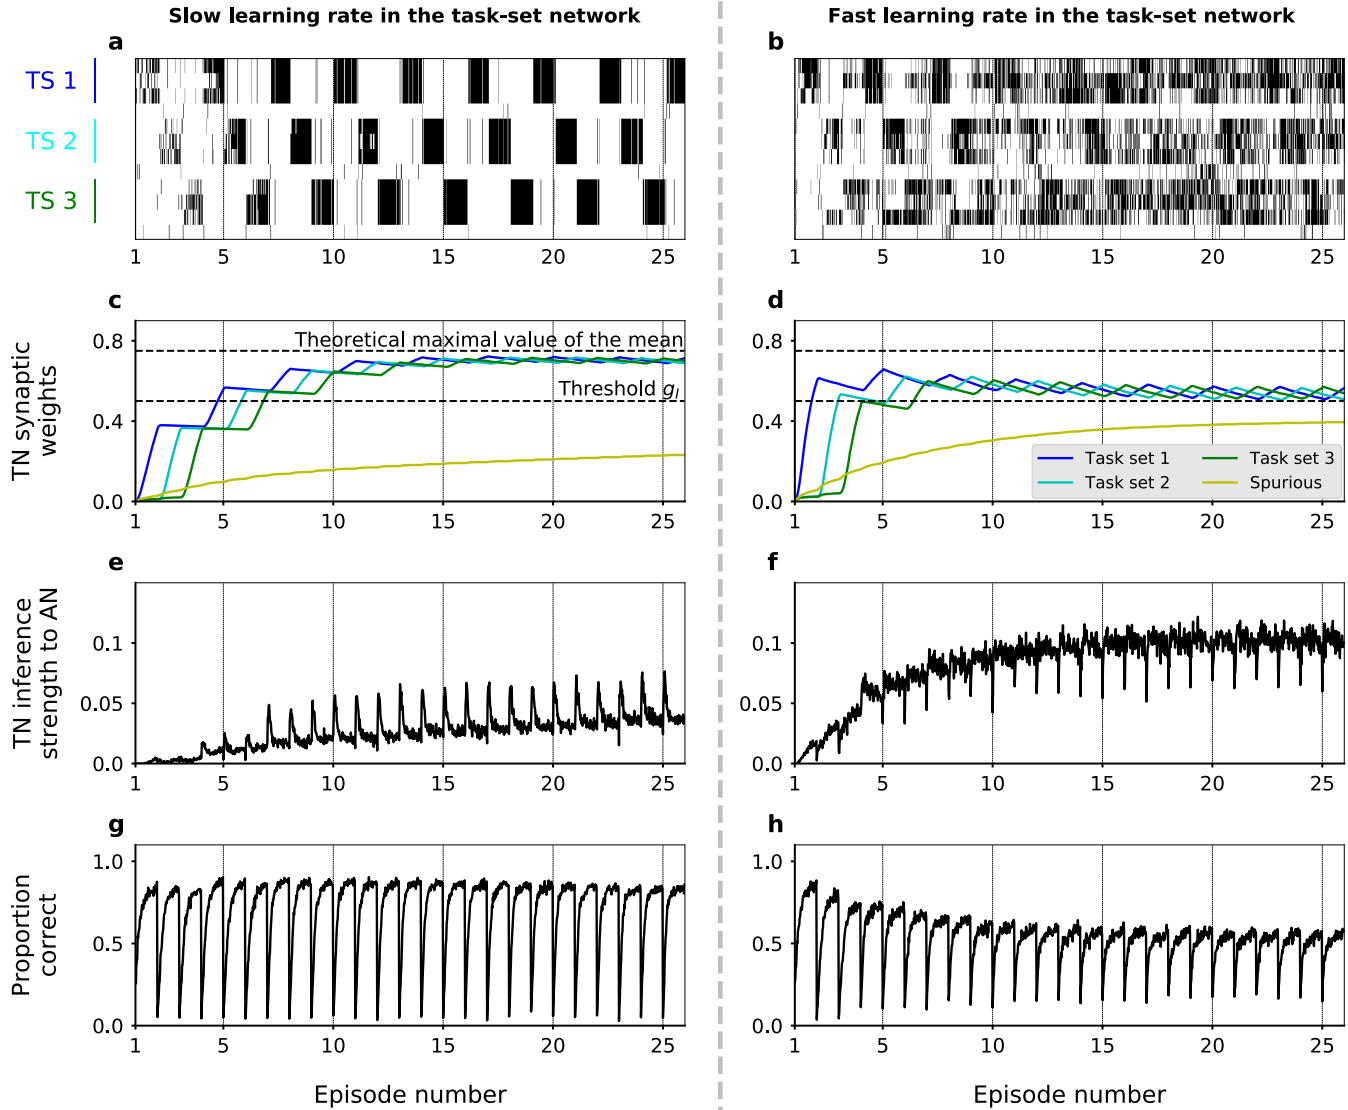

**Figure 3: Dynamics of task-set learning.** Left column: slow learning rate in the task-set network (TN) ( $Q_P = 0.17$ ); right column: fast learning rate in the task-set network ( $Q_P = 0.4$ ). **a,b**, Activation of neural populations in the task-set network as a function of time during one session. In (a), learning dynamics proceed correctly and lead to the chunking of populations that correspond to the same task-set. As a result, the activation of one stimulus-response association causes the co-activation of the other two in the same task-set. In contrast, in (b) learning does not proceed correctly and chunking does not take place. **c,d**, Average values of task-set network synaptic strengths between neural populations corresponding to each of the three correct task-sets, as well as “spurious” synaptic strengths between neural populations from different task-sets or that do not correspond to any task-set at all. **e,f**, Average value of the inference signal from the task-set network to the associative network connectivity. **g,h**, Performance of the network.

Task-sets presentation is periodic for illustration purposes. (a,b) corresponds to 1 run of the recurrent session. (c,d,e,f,g,h) corresponds to the average over 500 runs of the recurrent session.

The values of parameters other than  $Q_P$  were  $\alpha = 0.4$ ,  $\beta = 7$ ,  $\epsilon = 0$ , and  $J_{INC} = 0.7$ .

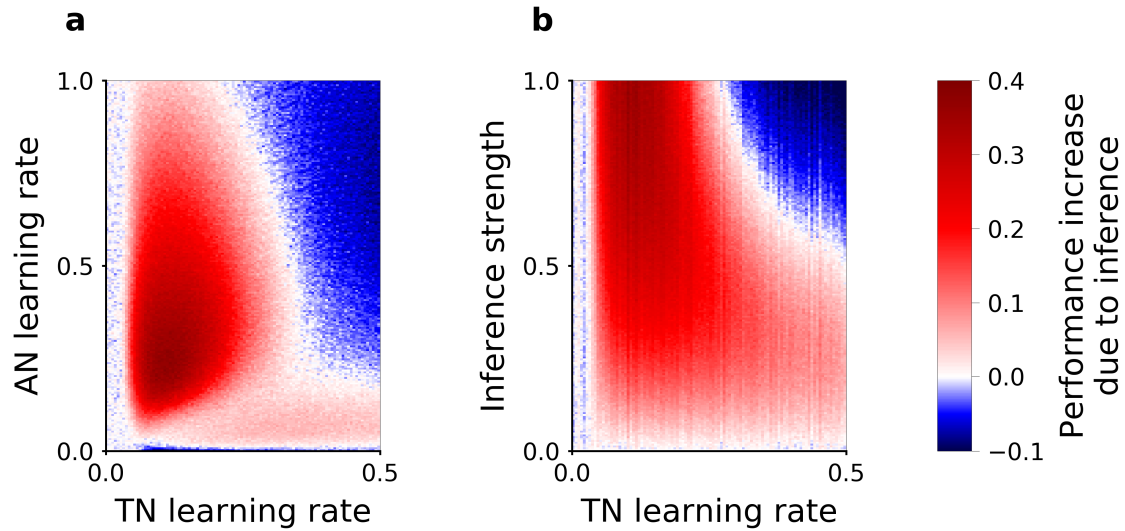

Figure 4: **Slow versus fast learning: conditions for correct encoding of task-sets in the network model.** **a**, Difference in the performance of the network model with or without task-set inference, plotted as function of the associative network learning rate  $\alpha$  and the task-set network learning rate  $Q_P$ , (with  $\beta = 7$  and inference strength  $J_{INC} = 0.7$ ). **b**, Same difference in performance but plotted as function of the inference strength  $J_{INC}$  and the task-set network learning rate  $Q_P$ , (with  $\beta = 7$  and associative network learning rate  $\alpha = 0.4$ ).

We computed the performance averaged over the 5 first correct responses for a stimulus, in the last third of the session, on an average of 200 runs of the recurrent session and with 10% noisy trials.

## Fitting the model to behavioral data

Having described the dynamics in the model, we next proceeded to fit the model parameters to the subjects' behavioral data. The full network model contains only five free parameters, which we determined independently for each subject by maximizing the likelihood of producing the same sequence of responses. To determine the importance of task-set retrieval in the model, we compared the fit obtained from our two nested models: the full model (associative network connected to the task-set network, 5 parameters), as well as the associative network model alone, without the inference signal that allows task-set recovery (3 free parameters). The full model with task-set inference provides a significantly better fit to the behavioral data in the recurrent session than does the model without task-set inference (Fig. 5a, Bayesian Information Criterion (BIC), T-test on related samples  $t = 14$ ,  $p = 4.3 \cdot 10^{-12}$ ). In the open-ended session, in which a given task-set never reoccurs between episodes, the two models provide instead indistinguishable fits. On average over subjects, the learning rate in the associative network ( $\bar{\alpha} = 0.35$ ,  $\sigma = 0.0073$ ) is twice the learning rate in the task-set network ( $\overline{Q_P} = 0.17$ ,  $\sigma = 0.0070$ ), which is consistent with our initial prediction that the learning rate in the task-set network needs to be slower than in the associative network.

As mentioned earlier, an important behavioral variability was present among subjects. This variability was particularly apparent in the performance following an episode switch, where some subjects increased their performance much faster than others in the recurrent session, compared to the open-ended session (Fig. 1b). Inspecting the parameter values obtained for different subjects revealed that the most variable model parameter between the recurrent and the open-ended sessions was the strength of the inference signal for task-set retrieval in the model (Fig. 5b, T-test on related samples  $t = 14.8$ ,  $p = 1.5 \cdot 10^{-12}$ ). The value of this parameter appeared to directly account for the inter-subject variability, as it correlated with the difference between BIC values obtained for models with and without task-set inference (linear regression  $r^2 = 0.81$ ,  $p = 1.4 \cdot 10^{-8}$ , Fig. 5c) as well as with the subjects' performance following the first correct trial in an episode (linear regression  $r^2 = 0.60$ ,  $p = 2.5 \cdot 10^{-5}$ , Fig. 5d). These findings further suggest the variability in that parameter is directly linked with the subject's ability to recover task-sets. This was confirmed by examining the results of a behaviorally-independent post-test debriefing used in the original study to classify subjects as either exploiting task-set structure ("exploiting" subjects) or not ("exploring" subjects). Exploiting subjects systematically corresponded to higher performance on trials following a correct response, and higher values of the inference parameter in the model (Fig. 5c,d).

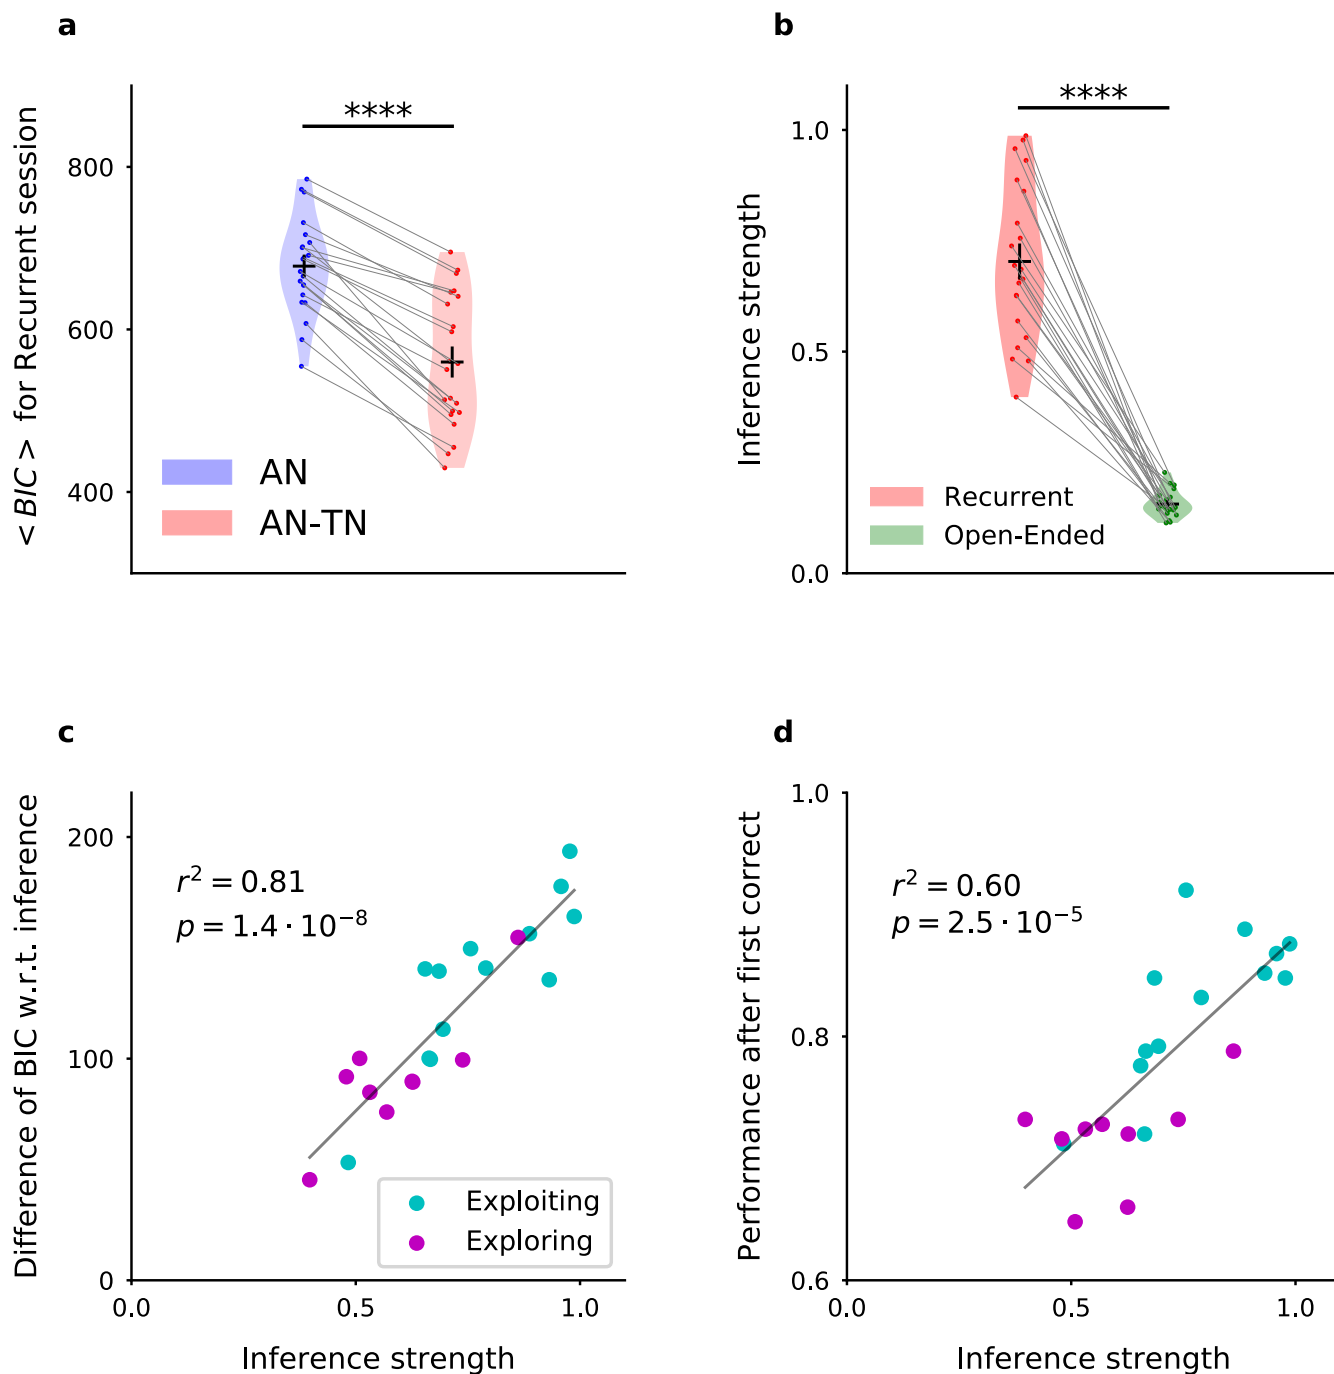

Figure 5: **Fitting the model to experimental data: the model with inference (AN-TN) captures the statistical structure of the data, and accounts for the variability between subjects.** **a**, Model comparison for the recurrent session. Bayesian Information Criterion, computed as in [Bishop, 2007], for the models with and without task-set inference. The model provides a significantly better fit with inference than without. **b**, Estimate of the inference strength  $J_{INC}$  from the task-set network to the associative network connectivity in the model with task-set inference, for both sessions. **c**, Subject by subject difference between BIC values obtained for models with and without task-set inference, as a function of the inference strength parameter. Subjects are classified as “exploiting” or “exploring” from a post-test debriefing. The grey line displays a least-squares regression. **d**, Subject by subject performance following the first correct trial in an episode, as a function of the inference strength parameter. The performance was computed by considering the 10 trials following the first correct trial of each episode. The grey line displays a least-squares regression.

## Testing model predictions for task-set retrieval

278 We next examined a specific subset of experimental trials where task-set retrieval is  
280 expected to take place. In the model, how quickly two stimulus-response pairs are chunked  
282 together depends on how often they co-occur, as well as on the value of the learning rate  
284 in the task-set network. Once two pairs are chunked together, the correct response to  
286 the stimulus corresponding to one of the pairs leads to the retrieval of the task-set, and  
biases the response to the stimulus from the second pair. When the pairs are not chunked  
together, the responses to the two stimuli are instead independent. The basic prediction  
is therefore that the responses to the stimulus from the second pair should differ between  
trials when chunking has or has not taken place, depending on the learning progress.

We first tested this prediction in a situation where chunking should lead to the re-  
288 trieval of the correct task-set. We focused on one trial in each episode, the trial that  
290 followed the first correct response (Fig. 6a). Running our model on the full sequence of  
292 preceding experimental events (on a subject-by-subject basis, using parameters fitted to  
294 each subject and actual sequences of stimuli and responses) produced a prediction for  
296 whether chunking had occurred for this trial (*chunked* or *independent*, Fig. 6a, orange  
and grey respectively). The model with inference predicted that the proportion of cor-  
rect responses on chunked trials should be higher than on independent trials due to the  
inference signal implementing task-set retrieval. In the model without inference where  
the associative network is independent of the task-set network, the performance on the  
two types of trials is instead indistinguishable. Comparing the proportion of correct re-  
298 sponses on experimental trials classified in the two categories showed a significant increase  
300 for chunked trials compared to independent trials (Fig. 6b: (i) model without inference  
 $t = 0.64$ ,  $p = 0.53$ , (ii) model with inference  $t = 6.9$ ,  $p = 1.4 \cdot 10^{-7}$ , (iii) subjects  $t = 2.8$ ,  
302  $p = 8.8 \cdot 10^{-3}$ , (iv) chunked trials, model without inference versus model with inference  
304  $t = 11$ ,  $p = 6.3 \cdot 10^{-10}$ , (v) chunked trials, model without inference versus subjects  $t = 5.9$ ,  
 $p = 2.3 \cdot 10^{-5}$ ), so that the model prediction with inference was directly borne out by  
306 experimental data. The task-set retrieval predicted by the model therefore led to a clear  
increase of subjects' performance. Moreover, reaction times on chunked trials were sig-  
nificantly lower than on independent trials, showing that the inference helped subjects to  
308 be faster at responding (Fig. 6c,  $t = 8.7$ ,  $p = 1.7 \cdot 10^{-9}$ ). This provides a supplementary  
validation, as the model was not fitted on reaction times. Note that a potential confound  
could be induced if the chunked trials appeared on average later in an episode than in-  
dependent trials. A direct comparison however showed that the distributions of chunked  
and independent trials were indistinguishable (Fig. S3a,  $ks = 0.085$ ,  $p = 0.62$ ).

312 We next tested the predictions of the model on trials where chunking leads to the  
retrieval of an incorrect task-set. Such a situation happens because of the presence of 10



314 % of trials with misleading feedback, which may indicate to the subject that the produced  
response was correct although it was not. Our model predicted that in this case incorrect  
316 task-set recovery leads to a decrease of the performance on the next trial. To test this  
prediction, we first detected the misleading trials, and then used the model to classify  
318 each of them as either chunked or independent (Fig. 6d). Comparing in the experimental  
data the responses on chunked trials with the performance of the model without task-set  
320 inference showed that indeed the subjects' performance was significantly reduced when  
the model predicted an incorrect task-set retrieval (Fig. 6e: (i) chunked trials, model  
322 without inference versus model with inference  $t = 5.8$ ,  $p = 1.0 \cdot 10^{-5}$ , (ii) chunked trials,  
model without inference versus subjects  $t = 5.2$ ,  $p = 2.2 \cdot 10^{-5}$ ).

324 The two behaviors described above (retrieval of a correct task-set after the first correct  
response, and retrieval of an incorrect task-set after a misleading feedback) cannot be  
326 predicted by the model without inference: we thus assessed the generative performance  
of our chunking mechanism and *falsified* the model without inference [Palminteri et al.,  
328 2017].

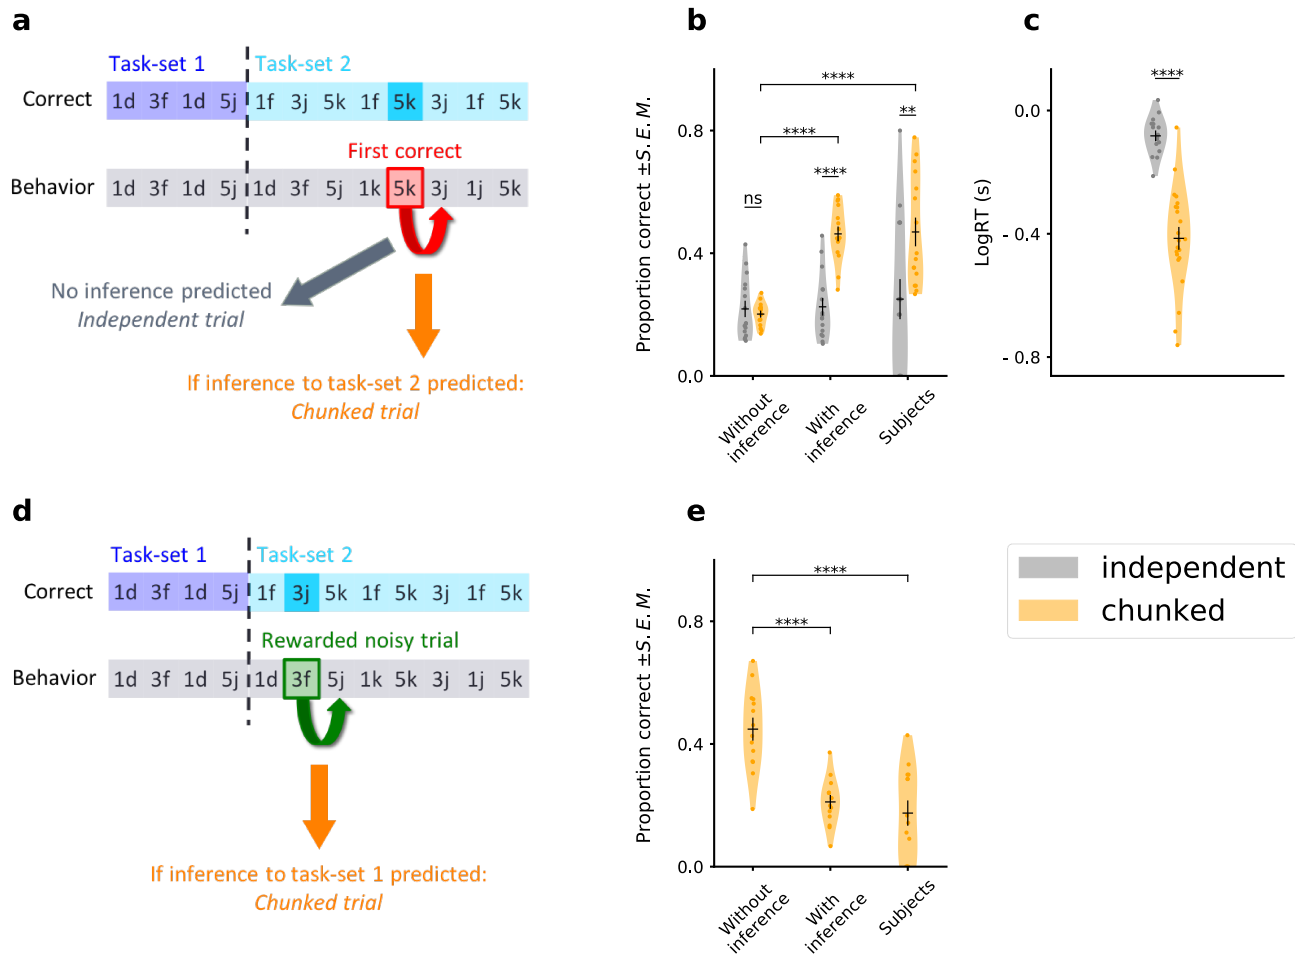

Figure 6: **Testing the predictions of the temporal chunking mechanism on specific trials.**

**a**, Schematic of the prediction for correct task-set retrieval. For each episode, and subject by subject, we compute the probability of making a correct choice after the first correct trial following an episode switch. Trials are classified from a model-based criterium as “chunked” or “independent”, respectively depending on the presence or absence of an inference from the task-set network to the associative network. **b**, Because of task-set inference, the model predicts a significant increase of performance on chunked trials compared to independent trials. This is not predicted by the associative network alone (“Model without inference”). Subject’s performance on these trials matches the model with inference. The error bars are larger for the *independent* trials because this category contains half the number of data, as shown in figure S3. **c**, Log of subjects’ reaction times in seconds, for trials classified as chunked or independent. **d**, Schematic of the prediction for task-set retrieval following misleading rewarded trials. After each episode switch, the subject is making incorrect choices. On 10% of these trials the feedback is misleadingly rewarded (e.g. 3f, which corresponds to a correct association for the previous task-set, but not for the current task-set). Because of the inference from the task-set network, the previous task-set can be incorrectly inferred by the model from this positive feedback: it’s a “chunked” trial. **e**, Probability of making a correct association after a misleadingly rewarded noisy trial classified as a chunked trial by the model. Because of the inference from the task-set network, the model predicts an incorrect association at the next trial, producing a decrease in performance. This decrease is not predicted by the associative network alone. Subject’s performance on these trials matches the model with inference. Violin plots display the shape of each distribution (Scott’s rule). Dots display the average for each subject. The black lines outline the mean  $\pm$  s.e.m.

## Task-set inference related activity in ventromedial, dorsomedial, and dorsolateral prefrontal nodes

The neural populations in the task-set network represent neurons selective to conjunctions of stimuli and responses. Temporal synaptic chunking between these neural populations over the course of learning created task-sets in the model, and predicted precisely timed retrievals, correct or maladaptive, and borne out by individual subjects' behavior. We aimed at understanding where this signal was implemented in the brain, using blood-oxygen-level-dependent signal recorded from functional magnetic resonance imaging (40 subjects, Experiment 2 [Donoso et al., 2014], see Fig. S2 for model fit on this dataset).

We first investigated neural correlates of the trial-by-trial synaptic strength of the chosen association in the associative network,  $W_{chosen}$ , at the onset decision (controlling for trial difficulty, through time-series of reaction times, see Methods). As shown in Fig. S5 (top), we found positive linear effects in striatum and ventromedial prefrontal cortex, and negative linear effects in dorsal anterior cingulate cortex, anterior supplementary motor area and lateral prefrontal cortex, in both experimental sessions. These results confirm previous findings in the field of value-based decision making [Alexander and Brown, 2011; Chib et al., 2009; Daw et al., 2006; Donoso et al., 2014; Lebreton et al., 2009; Neubert et al., 2015; Palminteri et al., 2015; Tanaka et al., 2004].

We then focused on the correlations between BOLD signal and the trial-by-trial inference signal strength which we found to distinguish the two experimental sessions, computationally and behaviorally (at the onset feedback, trial difficulty and prediction error were controlled with  $W_{chosen}$  and the time series of positive rewards, see Methods). In the recurrent session (Fig. S5, bottom), BOLD activity correlated positively with the inference signal strength in dorsolateral prefrontal cortex, dorsal anterior cingulate cortex and anterior supplementary motor area ; and negatively in ventromedial prefrontal cortex. In contrast, in the open-ended session, we found no significant positive or negative effect in frontal lobes corresponding to this parametric modulator. These results showed important differences between the two sessions, and suggested that a functional network engaging medial and dorsolateral prefrontal cortex is activated when the task-sets had to be learned and used (recurrent session versus open-ended session).

Hence we defined a functional network from significant BOLD activations in both sessions for the task-set network inference signal at the onset feedback. To do so, we performed a between-subjects ANOVA (contrasts REC+OE and -REC-OE, see Table 7 and Methods), which showed dorsomedial and dorsolateral prefrontal cortex correlated positively with the value of the inference signal. Ventromedial prefrontal cortex correlated negatively with the value of the inference signal, i.e. positively with the compatibility

between encoding in the two subnetworks (see Methods) when a reward is received.

| Whole brain activations for TN inference : ANOVA Recurrent/Open-Ended session |             |             |                      |                                                          |         |              |
|-------------------------------------------------------------------------------|-------------|-------------|----------------------|----------------------------------------------------------|---------|--------------|
| Contrast                                                                      | Label       | [ x y z ]   | Brodmann areas       | Glasser parcellation (area name)                         | t-value | Cluster size |
| REC+OE                                                                        | right dlPFC | [32 12 60]  | 6,8,9,10,11,44,45,46 | 6sma, 8Av, 8C, p9-46v, 46, a9-56v, 9-46d, 9a, i6-8, s6-8 | 9.25    | 519          |
|                                                                               | left dlPFC  | [-48 4 36]  | 6,8,9                | 8Av, 8C                                                  | 6.27    | 25           |
|                                                                               | dmPFC       | [4 24 48]   | 6,8,9,32             | SFL, SCEF, p32pr, d32, 8BM, 8BL, a32pr                   | 7.86    | 73           |
| Negative (REC+OE)                                                             | vmPFC       | [-12 48 -4] | 9,10,11,32           | a24, d32, p32, 10r, 9m, 9p, 9a, 10v, 25, s32, p24        | 7.64    | 225          |

Figure 7: **One-way ANOVA defining the functional network engaged in the TN inference signal computation.** The functional network is defined from activations from the parametric modulator corresponding to the TN inference signal, in both sessions (contrasts REC+OE and -REC-OE, FWE  $p = 0.05$ ).

dlPFC: dorsolateral prefrontal cortex; dmPFC: dorsomedial prefrontal cortex; vmPFC: ventromedial prefrontal cortex; [x y z] are MNI coordinates; REC: Recurrent session; OE: Open-Ended session.

366 This functional network was used for a ROI analysis on the trial-by-trial inference  
 368 signal to test the hypothesis of a specific effect of task-set retrieval in the recurrent session  
 (ventromedial, dorsomedial and dorsolateral prefrontal cortex respectively left, middle,  
 370 and right columns of Fig. 8a). These ROI were thus chosen from the analysis of a different  
 contrast (REC+OE, see Methods) that did not promote differences (REC versus OE).  
 First, we tested these ROIs at the onset feedback for  $W_{chosen}$  (top row) and for receiving  
 372 positive reward (thus on “prediction” error, middle row): both were significantly encoded  
 in the three ROIs, but no difference between experimental sessions was observed. The  
 374 task-set network inference signal was also significantly encoded in the three ROIs (bottom  
 row). However, the correlation with this signal in dorsomedial and dorsolateral prefrontal  
 376 cortex was significantly stronger in the recurrent session, compared to the open-session  
 (dmPFC:  $t = 3.0$ ,  $p = 3.2 \cdot 10^{-3}$ ; and dlPFC:  $t = 4.6$ ,  $p = 1.6 \cdot 10^{-5}$ ), i.e. when this signal  
 378 was needed to improve performance in the task. Activations in ventromedial prefrontal  
 cortex did not discriminate significantly between the two sessions ( $t = 0.16$ ,  $p = 0.87$ ).  
 380 This analysis showed a difference of neural activity in the dorsal system corresponding  
 to the necessity of learning and using (recurrent session) or not (open-ended session)  
 382 the model of the task. We controlled our neural findings by performing analyses with  
 ROI selected from several meta-analyses ([Glasser et al., 2016; Lancaster, 1997; Shirer  
 384 et al., 2012; Yarkoni et al., 2011], see Methods). As shown in Fig. S6, dorsolateral  
 and dorsomedial prefrontal cortex were specifically recruited in the recurrent session and  
 386 implicated in the computation of the inference signal for task-set retrieval.

Because of the specific timing predicted by the inference signal, we pushed further  
 388 this analysis by looking at the magnetic resonances responses at feedback onset, in these  
 ROI, to a similar GLM where the inference signal had been replaced by the succession  
 390 of 5 parametric regressors : an event-related regressor including only the first occurrence  
 (per episode) of inference for a chunked trial (related to Fig. 6a,b,c), and the same event-  
 392 related regressor shifted one or two trials preceding and following. This analysis is showed

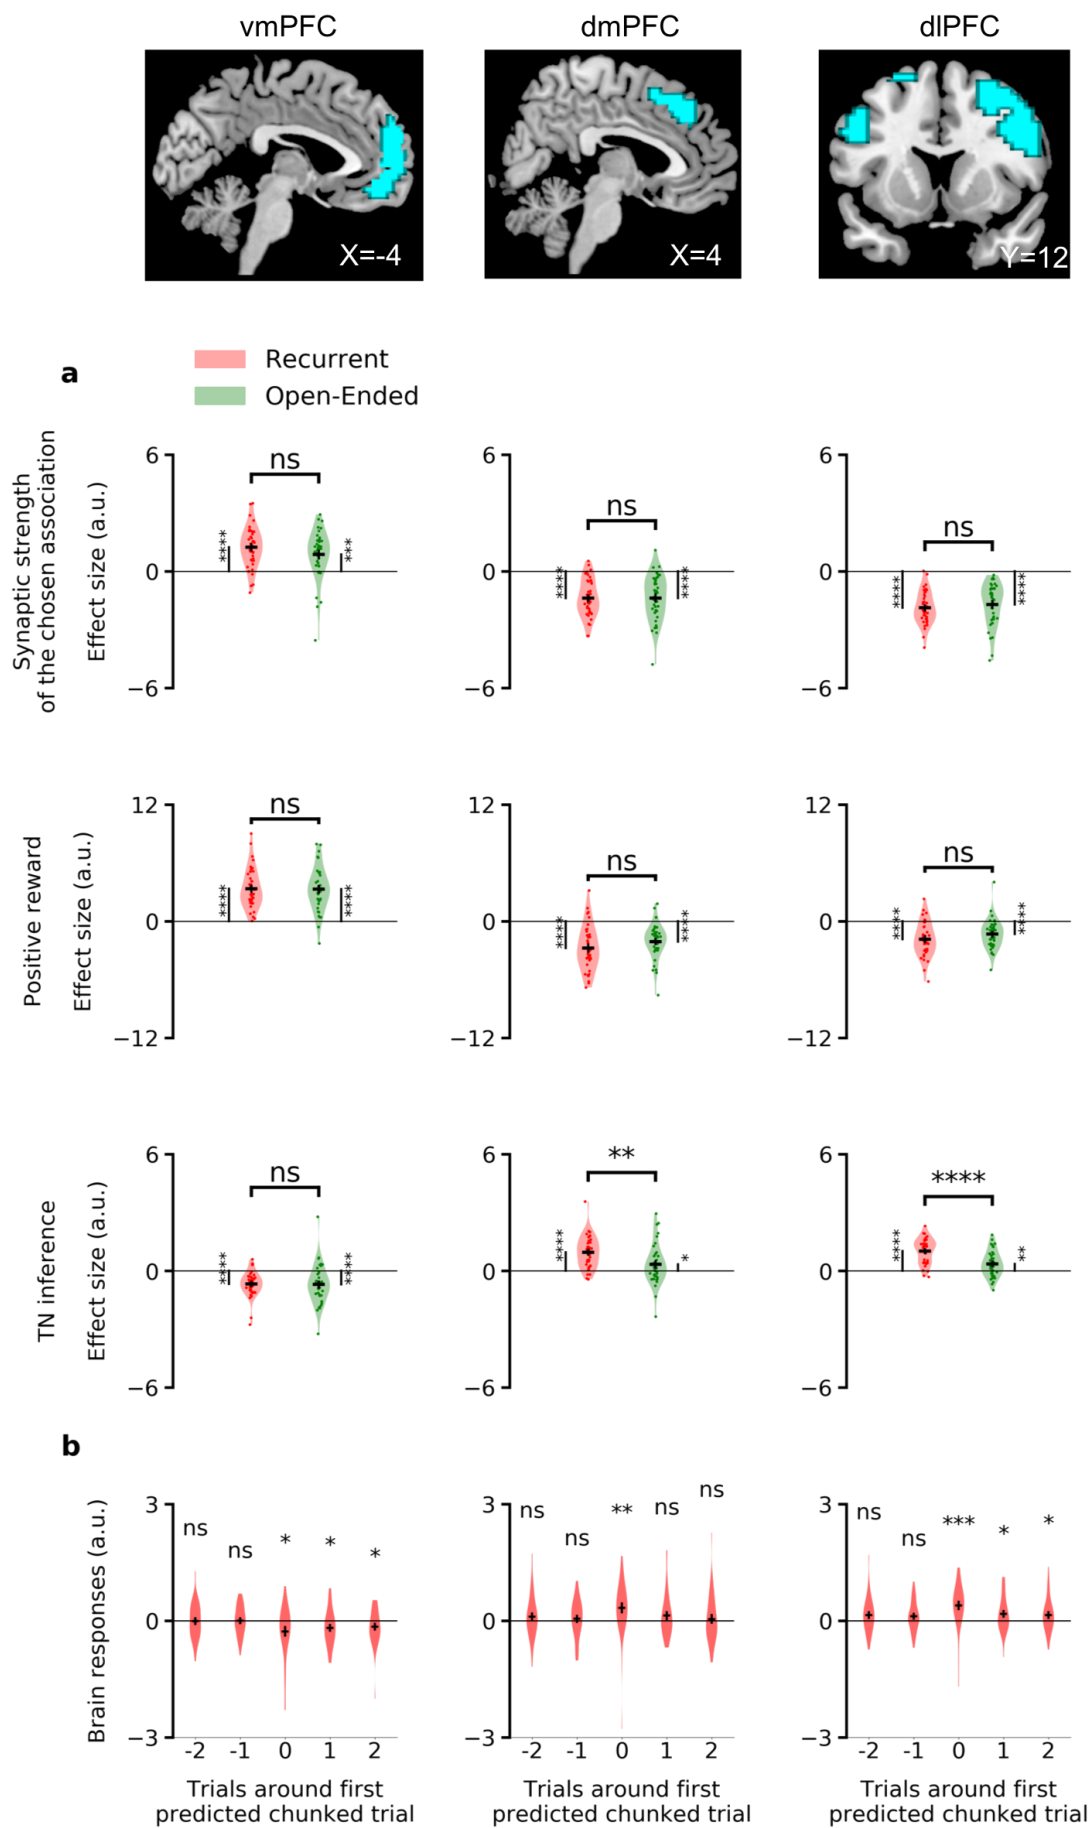

Figure 8: ROI analysis with the functional network defined from the ANOVA. Caption next page.

Figure 8: **ROI analysis with the functional network defined from the ANOVA.** The areas represented in blue are representing the regions identified in the previous analysis (Fig. 7) for the TN inference signal, using a significant threshold of FWE  $p = 0.05$ . **a,b,c**, They are tested at the onset feedback, thus independently, for the parametric modulators of the time series of  $W_{chosen}$ , positive rewards, and the inference signal. **b**, Same GLM, in the recurrent session, but we replaced the parametric regressor of the task-set network inference signal by five sparser time-series constituted of only one trial per episode and the corresponding events shifted one or two trials preceding and following it. This trial was chosen as the first chunked trial of the model behavioral predictions (per episode, if it existed from sufficient learning, Fig. 6a,b,c).

Effect sizes in arbitrary units for the recurrent and the open-ended session. Error bars correspond to the standard error of the mean over the 40 subjects. dlPFC: dorsolateral prefrontal cortex; dmPFC: dorsomedial prefrontal cortex; vmPFC: ventromedial prefrontal cortex

in Fig. 8b and confirmed that neural activity in these three ROI exhibits no response  
394 in the trials immediately preceding the first detected chunked trial. On the contrary,  
dorsomedial response is significant at the first detected chunked trial, and ventromedial  
396 and dorsolateral responses are significant from this trial onwards. The specific timing  
predicted by the model for this first detected chunked trial per episode is thus borne out  
398 both behaviorally (Fig. 6) and neurally (Fig. 8).

## Discussion

400 Task sets emerged in our model through unsupervised temporal chunking of stimulus-  
action associations encoded by mixed-selective neural populations. When repeated, a  
402 task-set could be retrieved from a single stimulus-action association by reactivation of the  
whole chunk. This retrieval then biased the downstream decision-making circuit through  
404 an inference signal. The model predicted finely timed, abrupt changes in behavioral  
responses in a task-set learning experiment [Collins and Koechlin, 2012; Donoso et al.,  
406 2014]. The retrieval of a task-set had both adaptive (reduction of exploration) and  
sometimes maladaptive effects (retrieval of an incorrect task-set) on the following trial  
408 performance. Our analysis of BOLD activity established a functional network engaging  
ventromedial, dorsomedial, and dorsolateral prefrontal cortex that correlated with the  
410 inference signal for task-set retrieval. The dorsal system was engaged preferentially in  
the situation where the retrieval of a task-set was used to improve performance.

### 412 **Biologically plausibility of the temporal chunking mechanism.**

The temporal chunking mechanism is implemented through simplified, but biologically  
414 plausible processes. The reward-dependent Hebbian learning and winner-take-all mecha-  
nisms of the associative network builds on previous studies in the field of conditional asso-  
416 ciative learning [Fusi et al., 2007; Soltani et al., 2017; Soltani and Wang, 2010; Wang, 2002;

418 Wong and Wang, 2006]. Hebbian plasticity in the task-set network is slower, activity-  
mediated and unsupervised, creating task-sets as chunks of temporally contiguous events.  
420 The required mixed-selectivity can be obtained from randomly connected neurons re-  
ceiving feed-forward inputs coming from sensory and motor areas and has been widely  
422 observed in the prefrontal cortex [Asaad et al., 1998; Genovesio et al., 2005; Rigotti et al.,  
2013; Wallis et al., 2001]. Moreover, learning at behavioral timescales can be generated  
424 through sustained neural activity and extended STDP [Brunel, 1996; Compte et al., 2000;  
Curtis and Lee, 2010; Drew and Abbott, 2006; Miller and Cohen, 2001; Murray et al.,  
2017; Rougier et al., 2005; Van Rossum et al., 2000]. Finally, the inference signal for  
426 task-set retrieval solves an exclusive-or problem, as different task-sets map from the same  
set of stimuli and actions. It can be implemented through random projections from an  
428 extra-pool of non-linear mixed selective cells both selective to the “internal” synaptic  
chunk (task-set) and to external events like the presentation of a stimulus [Fusi et al.,  
430 2016; Rigotti et al., 2013].

## Neural correlates of task-set retrieval.

432 Consistent with the literature on the neural correlates of goal-directed behavior, we found  
that the inference signal predicting the retrieval of a task-set correlated specifically with  
434 BOLD activity in ventromedial, dorsomedial and dorsolateral prefrontal networks.

436 First, the associative network “prediction error” correlated with activity in striatum  
and ventromedial prefrontal cortex [Daw et al., 2006; Lebreton et al., 2009; Palminteri  
438 et al., 2015; Tanaka et al., 2004]. Ventromedial prefrontal cortex also correlated negatively  
with the inference signal, i.e. positively with the compatibility between encoding in the  
440 two subnetworks when a reward was received (as a prediction error-like signal). This is  
potentially in accordance with the role of ventromedial prefrontal cortex in monitoring  
the Bayesian actor reliability in this experiment [Donoso et al., 2014].

442 Second, dorsal prefrontal cortex was preferentially engaged when the model of the task  
(i.e., the task-sets) is useful and integrates into the behavioral policy (recurrent versus  
444 open-ended sessions, while controlling for trial perceived difficulty, as implemented by  
reaction times [Shenhav et al., 2013, 2014]). Dorsolateral prefrontal cortex is known to  
446 be specifically engaged for temporally integrating and organizing multimodal information  
[Duncan, 2001; Kim et al., 2008; Ma et al., 2014; Miller, 2000; O’Reilly, 2010; Sakai,  
448 2008]. Previous work showed that neurons in the anterior cingulate cortex monitor the  
allocation and the intensity of control [Behrens et al., 2007; Dosenbach et al., 2006; Enel  
450 et al., 2016; Khamassi et al., 2013; Rushworth et al., 2007; Shenhav et al., 2013]. In  
this specific experiment, but through a Bayesian framework, the dorsal anterior cingulate  
452 cortex was shown to be specifically selective to switch-in events [Donoso et al., 2014].



## Stability/flexibility trade-off from the unsupervised temporal chunking mechanism.

Our model builds on an attractor concretion mechanism [Rigotti et al., 2010b] while being simplified: we don't make the hypothesis of the existence of fixed attractors. Instead, the synaptic weights are modified immediately from the start and continuously. Thus, the task-set network can learn from its own activity, combining prior statistical information to future learning, crucial in non-stationary problems. In order for this mechanism to be stable when learning concurrent task-sets, learning has to be slower as the representational complexity increases.

This mechanism also enables the encoding of a synaptic trace of any sequence of events, even incorrect, as a transition probability (weak but non-zero) between chunks or with an isolated neural population. The brain relies on estimates of uncertainty within and between task-sets [Collins and Koechlin, 2012; Courville et al., 2006; Donoso et al., 2014; Gershman and Niv, 2012; Kepecs and Mainen, 2012; Rushworth and Behrens, 2008; Soltani and Izquierdo, 2019; Yu and Dayan, 2005]. More specifically, Collins and Koechlin [Collins and Koechlin, 2012] have shown that the Bayesian likelihood (“reliability”) of each task-set in memory is evaluated. Inferences on the current and alternative task-sets have been found to occur in medial and lateral prefrontal cortices respectively [Donoso et al., 2014]. The coupling between these two tracks permits hypothesis testing for optimal behavior. Future work could investigate how an estimate of uncertainty (or reliability over task-sets) is retrieved from the synaptic weights of our model. This synaptic trace could then be used by the cholinergic and noradrenergic systems to modify the relative influence of top-down control (TN-like) versus bottom-up experience-dependent (AN-like), integration of information [Aston-Jones and Cohen, 2005; Sara, 2009], or to regulate the learning rates and the exploration parameters [Doya, 2002; Farashahi et al., 2017] responsible for the stability/flexibility trade-off of this temporal chunking mechanism.

## Temporal chunking in layers of mixed-selective cells is a plausible implementation of multi-step transition maps and generalization.

Cognitive control and learning are linked and depend on the formation of hierarchical representations in the brain [Badre, 2008; Badre et al., 2009, 2010]. Plasticity and recurrence between mixed-selective cells in prefrontal cortex create a conjunctive code seeding a flexible “representational medium” [Duncan, 2001; Ma et al., 2014; Manohar et al., 2019; Miller, 2000]. Through simple Hebbian learning at decreasing timescales in decoupled layers of mixed-selective cells, momentarily stable chunks combining states, action, rewards, or more abstract “task-sets” can be encoded, as well as the transition statistics



488 between them, to create hierarchically more complex chunks. A local change in the state  
490 transition function of the task, or during reward devaluation, will have the effect of flex-  
ably depressing the newly unused synaptic link without relearning the whole transition  
492 rule. This “model-free” mechanism thus encodes the discounted occupancy of a state  
(or action, or any task-relevant feature), averaged over trajectories beginning from that  
494 state, leading to model-based behavior [Behrens et al., 2018; Russek et al., 2017] while  
also accounting for limited memory capacity [Blumenfeld et al., 2006; Nassar et al., 2018;  
Ostojic and Fusi, 2013].

496 This mechanism can also generalize. Augmenting our network with a generaliza-  
tion layer composed of neurons selective to the combination of three stimuli and three  
498 actions could produce faster learning of a new task-set by biasing lower cortical struc-  
tures. In this simplistic scheme, generalization is a top-down, gating-like mechanism  
500 solving exclusive-or problems between layers of cells of decreasing complexity. Caching  
multi-steps transitions in a single value (model-free) or not (model-based) would then be  
502 equivalent to learning at slower timescales in an increasingly complex hierarchy of cortex  
layers [Murray et al., 2014].

## 504 Acknowledgements

FB was funded by Ecole des Neurosciences de Paris Ile-de-France and Region Ile de France  
506 (DIM Cerveau & Pensee). SP is supported by an ATIP-Avenir grant (R16069JS) Col-  
laborative Research in Computational Neuroscience ANR-NSF grant (ANR-16-NEUC-  
508 0004), the Programme Emergence(s) de la Ville de Paris, the Fondation Fyssen and the  
Fondation Schlumberger pour l’Education et la Recherche. SO is funded by the Ecole  
510 des Neurosciences de Paris Ile-de-France, the Programme Emergences of City of Paris,  
Agence Nationale de la Recherche grants ANR-16-CE37- 0016-01 and ANR-17-ERC2-  
512 0005-01. This work was supported by the program “Investissements d’Avenir” launched  
by the French Government and implemented by the ANR, with the references ANR-10-  
514 LABX-0087 IEC and ANR11-IDEX-0001-02 PSL Research University.

## Competing Interests

516 The authors declare no competing interests.

## Materials and Methods

### Experimental procedures

#### The experimental task

We modeled a specific human experiment for concurrent task-set monitoring, previously reported in [Collins and Koechlin, 2012; Donoso et al., 2014]. The detail of the experimental procedures can be found in the original papers, here we provide only a summary. Data from [Collins and Koechlin, 2012] are called *Experiment 1*. Data from [Donoso et al., 2014] are called *Experiment 2*. The experimental designs are identical. *Experiment 1* is a behavioral experiment including 22 subjects. *Experiment 2* involves 40 subjects, with fMRI acquisition.

Subjects had to search for implicit associations between 3 digits and 4 letters by trial and error. In each trial, a visual stimulus (a digit on the screen in  $\{1, 3, 5\}$  or  $\{2, 4, 6\}$ ) was presented to the subject (Fig. 1a). The subject had to take an action by pressing a letter on a keyboard in  $\{d, f, j, k\}$ . The outcome (reward or no reward) was announced with a visual and auditory feedback. A visual measure of the cumulative collected profit was displayed on the screen. For each trial of Experiment 1, the subject had 1.5 seconds to reply during the presentation of the stimulus. The average length of a trial was 2.9s. For Experiment 2, the mean of a trial was either 6s or 3.6s, whether BOLD activity is acquired or not. MRI trials were longer, introducing jitters at stimulus or reward onsets for signal decorrelation.

A *correct association* between the stimulus and the action led to positive reward with a probability 90%. An incorrect association between the stimulus and the action led to a null reward with a probability 90%. 10% of (pseudo-randomized) trials were misleading *noisy trials*, yielding to a positive reward for an incorrect association, and vice-versa. Thus a null feedback could be produced either by a behavioral error, by a change in correct associations, or by noise. The introduction of noisy trials prevented subjects from inferring a change in correct associations from a single unrewarded trial.

The correct set of responses to stimuli remained unchanged over a block of 36 to 54 trials. Such a block is called an *episode*. The transition from one episode to another is called an *episode switch* and was not explicitly cued. This transition imposes a change of correct responses from all stimuli, so a change of *task-set*. Task-sets were always non-overlapping from one episode to the other, i.e. each and every of the three stimulus-

552 response associations differ after an episode switch. Within a given set, two stimuli were  
never associated with the same action.

554 An experimental *session* was a succession of 25 episodes for Experiment 1, and 24  
episodes for Experiment 2. BOLD activity was acquired only during the 16 last episodes  
556 of Experiment 2.

558 In each experiment, subjects performed two distinct sessions: an open-ended and a  
recurrent session. In the *open-ended* session, task-sets were different in each episode, so  
560 there was no possibility for the subject to retrieve and reuse a formerly learned one. In  
the *recurrent* session, only 3 task-sets reoccurred across episodes (Fig. 1a), and subjects  
562 could reuse previously learned task-sets. Subjects were not informed about the distinc-  
tion between the two sessions. The order of the sessions was changed between subjects  
564 to counteract for potential session-ordering effect. Different digits were used from one  
session to the other.

566 Having to manipulate at least 3 different task-sets was crucial: indeed when there  
are only 2 of them, the second one could be inferred from the first one by elimination.  
568 With 3 task-sets, and after an episode switch, some exploration is required to find the  
next mapping to use. More possible actions than the number of stimuli were used to  
570 avoid learning the third stimulus-response association by simple elimination when two  
associations were already known.  
572

## 574 **Debriefing**

After each session, subjects performed a post-test debriefing. They were presented with 6  
576 task-sets and rated them depending on their confidence in having seen them or not during  
the experiment. For the recurrent session, 3 out of the 6 task-sets were actually presented  
578 during the experiment. For the open-ended session, the 6 task-sets were all part of the  
experiment. From the debriefing of the recurrent session, subjects were classified in two  
580 different groups. *Exploiting subjects* ranked higher confidence for the 3 seen task-sets,  
compared to the 3 unseen task-sets. *Exploring subjects*, on the contrary, ranked at least  
582 1 unseen task-set with more confidence than one of the 3 seen task-sets.

## **Network model**

584 The network model is based on [Rigotti et al., 2010b]. It is composed of two interacting  
subnetworks, the associative and task-set networks, illustrated in (Fig. 1d). In contrast

586 to Rigotti et al. [2010b], we do not explicitly model temporal dynamics within a trial,  
but instead use simplified, instantaneous dynamics between populations replacing many  
588 mixed-selective neurons [Fusi et al., 2016]. Moreover the feedback from the task-set  
network to the associative network is implemented in a simplified manner. Full details of  
590 the model implementation are given below.

### The associative network

592 The associative network ( $AN$ ) is based on [Fusi et al., 2007]. This subnetwork imple-  
ments in a simplified fashion the associations between input stimuli and output actions  
594 performed by a classical winner-take-all decision network [Brunel and Wang, 2001; Fusi  
et al., 2007; Wang, 2002].

596  
The associative network is composed of neural populations selective to a single task-  
598 related aspect, either a stimulus or an action. Each population is either active or inactive  
in any trial, so that the activity is modeled as being binary. Any stimulus-selective  
600 neural population  $\{S_i\}_{i=1..3}$  projects excitatory synapses to all response-selective neu-  
ral population  $\{A_j\}_{i=1..4}$ . The corresponding synaptic strength is noted  $J_{S_i \rightarrow A_j}^{AN} \in [0, 1]$ .  
602 The behavioral output in response to a stimulus is determined based on these synaptic  
strengths, which moreover plastically change depending on the outcome of the trial (re-  
604 ward or no reward).

606 **Action selection in the associative network** In any given trial, following the pre-  
sentation of a stimulus  $S_i$ , the associative network stochastically selects an action based  
608 on the strengths of the synapses from the population  $S_i = 1$  to the populations that  
encode actions. Specifically, the action  $A_j$  is selected with the probability

$$P(A_j|S_i) = \frac{\epsilon}{n_A} + (1 - \epsilon) \frac{\exp(\beta J_{S_i \rightarrow A_j}^{AN})}{\sum_{k=1}^{n_A} \exp(\beta J_{S_i \rightarrow A_k}^{AN})} \quad (1)$$

610 where  $n_A$  is the number of possible actions,  $1/\beta$  is the strength of decision noise and  $\epsilon$   
accounts for the network's internal estimate of *expected uncertainty* [Yu and Dayan, 2005].  
612 The associative network therefore effectively implements a soft and noisy winner-take-all  
mechanism: all actions are equiprobable for high decision noise, whereas the probability  
614 of the action with the largest synaptic strength tends to 1 for low decision noise.

**Synaptic plasticity in the associative network** Learning of the basic stimulus-  
616 action associations is implemented through plastic modifications of the synaptic strengths

in the associative network. Following an action, the synaptic strengths are updated according to a reward-modulated, activity-dependent learning rule:

$$J_{S_i \rightarrow A_j}^{AN} \leftarrow J_{S_i \rightarrow A_j}^{AN} + \alpha_+(r, S_i, A_j) \cdot (1 - J_{S_i \rightarrow A_j}^{AN}) - \alpha_-(r, S_i, A_j) \cdot J_{S_i \rightarrow A_j}^{AN} \quad (2)$$

where  $r$  is the obtained reward ( $r = 0$  or  $1$ ), and  $\alpha_+$  and  $\alpha_-$  are respectively the rates of potentiation and depression which depend on the reward as well as the activity of pre- and post-synaptic populations. Note that the update rule implements soft bounds on synaptic strengths, and ensures biological plausible saturation of neural activity, as well as forgetfulness [Amit and Fusi, 1994; Fusi, 2002; Fusi et al., 2007; Ostojic and Fusi, 2013].

The synaptic plasticity is local, so that only synapses corresponding to the active pre-synaptic population  $S_i$  are updated. Moreover, for simplicity, all non-zero potentiation and depression rates are equal and given by a parameter  $\alpha$ . We therefore have

$$\alpha_+(r = 1, S_i = 1, A_j = 1) = \alpha_-(r = 1, S_i = 1, A_j = 0) = \alpha \quad (3)$$

if the reward is positive, and

$$\alpha_+(r = 0, S_i = 1, A_j = 0) = \alpha_-(r = 0, S_i = 1, A_j = 1) = \alpha \quad (4)$$

if the reward is null. All other potentiation and depression rates are zero.

The simplest implementation of the associative network therefore has three free parameters: the learning rate  $\alpha$  and noise parameters  $\beta$  and  $\epsilon$ . When fitting the model to human behavior, we have examined the possibility of adding complexity by distinguishing the learning rates corresponding to distinct reward and pre/post-synaptic events. The presented results on model fits, model dynamics and model predictions concerning the recurrent session in the present study are not modified by this extension.

## The task-set network

The task-set network ( $TN$ ) is composed of mixed-selective neural populations, which are selective to conjunctions  $S_i A_j$  of one stimulus and one action. As in the associative network, the activity of each population in the task-set network is represented as binary (either active or inactive). The task-set network is fully connected: any neural population  $S_i A_j$  projects excitatory synapses to all other neural populations  $S_k A_l$ , with strength  $J_{S_i A_j \rightarrow S_k A_l}^{TN} \in [0, 1]$ . The strengths of these synapses are plastically updated, and determine the co-activation of populations in the task-set network. This co-activation effectively encodes task-sets. Full details of the model implementation are given below.

646 **Activation of populations in the task-set network** At each trial, a stimulus  $S_i$   
is presented and the associative network selects an action  $A_j$ . In the task-set network,  
648 this leads to the activation of the population  $S_iA_j$ . Depending on the synaptic strengths,  
this may in turn lead to the co-activation of other populations in the task-set network.  
650 Specifically, if the synaptic strength  $J_{S_iA_j \rightarrow S_kA_l}^{TN}$  is greater than the parameter  $g_I$ , the  
population  $S_kA_l$  is activated. This step is iterated until no additional population gets ac-  
652 tivated. Here the parameter  $g_I$  represents an inhibitory threshold equivalent to a constant  
negative coupling between all populations in the task-set network, and implements in a  
654 simplified way a competition between excitatory neural populations through recurrent  
feedback inhibition.

656 These activation dynamics are assumed to be fast on the timescale of a trial, and  
therefore implemented as instantaneous.

658 **Synaptic plasticity in the task-set network** The synapses in the task-set network  
are updated following an unsupervised, Hebbian plasticity rule. This update is driven by  
660 the sequential activation of neural populations in the task-set network, and thus by the  
associative network dynamics (Fig. 1d).

662 When two populations in the task-set network are activated on two consecutive trials,  
the synapses connecting them are potentiated. Noting  $S_tA_t$  the task-set network neural  
664 population active at trial  $t$ , and  $S_{t+1}A_{t+1}$  the neural population active at trial  $t + 1$ , this  
potentiation is given by

$$J_{S_tA_t \rightarrow S_{t+1}A_{t+1}}^{TN} \leftarrow J_{S_tA_t \rightarrow S_{t+1}A_{t+1}}^{TN} + Q_P \cdot (1 - J_{S_tA_t \rightarrow S_{t+1}A_{t+1}}^{TN}) \quad (5)$$

666 where the parameter  $Q_P$  represents the learning rate for potentiation.

At each trial, all the synapses from the active neural population  $S_tA_t = 1$  are depressed  
668 (*pre-activated depression* [Ostojic and Fusi, 2013]), implementing an effective homeostatic  
control. This depression is given by

$$J_{S_tA_t \rightarrow S_kA_l}^{TN} \leftarrow J_{S_tA_t \rightarrow S_kA_l}^{TN} - Q_M \cdot J_{S_tA_t \rightarrow S_kA_l}^{TN} \quad (6)$$

670 where  $Q_M$  is the rate of depression.

The ratio  $Q_p/Q_m$  between the potentiation and the depression rates determines the  
672 asymptotic values of the synaptic strengths [Ostojic and Fusi, 2013]. To produce co-  
activation of populations in the task-set network and therefore the learning of task-sets,  
674 this asymptotic value needs to be higher than the inhibition threshold  $g_I$ . To avoid any

676 redundancy between the parameters we fixed  $g_I$  to 0.5 and  $Q_M = \frac{Q_P}{10}$ , so that  $Q_P$  is the only free parameter.

**Interaction between associative network and task-set network** To implement the effect of the task-set network dynamics and learning on the output of the network, the pattern of activity in the task-set network needs to influence the activation in the associative network. In our model this interaction is implemented in a simplified fashion.

682 If the previous trial was rewarded, the activation in the associative network on the next trial is biased towards the stimulus-action combinations that correspond to activated populations in the task-set network. This effective *inference signal* is implemented by modulating the strength of synapses in the associative network. Specifically, If  $r = 1$  and  $S_k A_l = 1$  in the task-set network on the previous trial, the synaptic strength from  $S_k$  to  $A_l$  in the associative network is increased according to

$$J_{S_k \rightarrow A_l}^{AN} \leftarrow J_{S_k \rightarrow A_l}^{AN} + J_{INC} \cdot (1 - J_{S_k \rightarrow A_l}^{AN}) \quad (7)$$

where the parameter  $J_{INC}$  specifies the strength of the inference signal.

688 The strength of the inference signal thus corresponds to the discrepancy between the task-set network prediction and the associative network encoding when a reward is received (or its negative counterpart, the compatibility).

## Model fitting to behavioral data and simulation

692 The model without task-set inference has 3 free parameters, and the model with task-set inference has 5 free parameters. The parameter set is composed of the associative network learning rate  $\alpha$ , the task-set network learning rate  $Q_P$ , the parameters of the soft and noisy winner-take-all mechanism (decision noise  $1/\beta$  and uncertainty  $\epsilon$ ), and the inference strength  $J_{INC}$  from task-set network to associative network connectivity.

696 Both models were fitted to behavioral data using the standard maximum likelihood estimation (MLE). We provide the model with the subject's set of actions and we define the model *performance on a trial* as the model's likelihood of observing the subject's response at the next trial. The Bayesian information criterion (Fig. 5a) uses the likelihood computed by MLE but introduces a penalty term for model complexity depending on the size of the observed sample. We also compared the AIC (Akaike information criterion) for both models and reached identical conclusions. A larger log-likelihood and lower BIC and AIC correspond to best model fits. We combined a grid search on initial parameters values with a gradient descent algorithm from the SciPy optimization toolbox. Parameters were estimated subject by subject.

708 On average over subjects (see Fig. S1), the learning rate in the associative network  
710 ( $\bar{\alpha} = 0.35$ ,  $\sigma = 0.0073$ ) is twice the learning rate in the task-set network ( $\overline{Q_P} = 0.17$ ,  
712  $\sigma = 0.0070$ ). The inference strength from the task-set network to the associative network  
is high in the recurrent session ( $\overline{J_{INC}} = 0.70$ ,  $\sigma = 0.037$ ), and its value is significantly  
lower in the open-ended session ( $\overline{J_{INC}} = 0.16$ ,  $\sigma = 0.0062$ , see Fig. 5b).

714 We also compared model simulations ex post (model recovery [Palminteri et al., 2017]),  
with and without task-set inference. In a simulation, the model's actions are random  
716 depending on the trial by trial probability set computed from the winner-take-all mech-  
anism. The *model performance* is now the probability predicted by the model for the  
718 correct action, at each trial. Model simulation reproduce model fits and data, which  
ensures that we are not overfitting subjects' data.

## 720 **fMRI whole brain analysis**

The model-based fMRI analysis was performed with SPM 12. The detail of the data  
722 acquisition can be found in [Donoso et al., 2014].

All parametric modulators are z-scored to ensure between regressor and between subjects  
724 commensurability [Lebreton and Palminteri, 2016]. For each onset, they are orthogonal-  
ized to avoid taking into account their shared variance. fMRI data were analyzed us-  
726 ing an event-related General Linear Model. Regressors of non-interest include subjects'  
lapses, post-pause trials at the beginning of each scanning run, and movement parame-  
728 ters. Event-related regressors of interest modeled separately the onset decision (stimulus  
presentation timing, covering the decision time window) and the onset feedback (outcome  
730 presentation timing). The regressors are based on the best fitting parameters at the sub-  
ject level.

732 At the onset decision, the regressor includes orthogonalized parametric modulations  
734 following this order :

- 736 • The first modulator is the time-series of reaction times, an index of trial difficulty  
and a specific motor preparation-related activity.
- 738 • The second modulator is the associative network synaptic strength from the pre-  
sented stimulus selective neural population to the chosen action selective neural  
population. We call this parameter  $W_{chosen}$  and it is also an index of trial difficulty.

740 At the onset feedback, the regressor includes orthogonalized parametric modulations  
following this order :



- 742 • The first parametric modulator is  $W_{chosen}$ . This control ensures that the correlations  
observed are not simply caused by the monitoring of the certainty on the chosen  
744 association (prediction error) or else the trial difficulty.
- The second parametric modulator is the time series of positive rewards.
- 746 • The third parametric modulator is the trial-by-trial average value of the inference  
signal from the task-set network to the associative network. It is thus the average,  
748 over the number of connections implicated, of the task-set network inference on the  
update of associative network synaptic weights. We call it *TN inference*.

750 All the mentioned time series are convolved with the hemodynamic response function  
to account for the hemodynamic lag effect.

752 The subject by subject statistical maps are combined to make generalizable inferences  
754 about the population. We use a *random effect analysis* approach [Holmes and Friston,  
1998]. We identify activations using a significance threshold set to  $p = 0.05$  (familywise  
756 error FWE corrected for multiple comparison over the whole brain).

For conciseness, and because and mixed-selectivity has been found in prefrontal cortex  
758 [Fusi et al., 2016], we do not report posterior activations (parietal, temporal and occipital  
lobes).

760 Note that we did a preliminary control analysis using the link between the associative  
network and Q-learning [Watkins and Dayan, 1992] by searching for any correlation be-  
762 tween BOLD activity and the prediction error, i.e. the difference between the perceived  
outcome and the associative network synaptic strength of the trial-by-trial chosen asso-  
764 ciation. As expected from previous studies [Daw et al., 2006; Kim et al., 2006; Lebreton  
et al., 2009; O’Doherty et al., 2004; Tanaka et al., 2004], we found ventromedial prefrontal  
766 cortex and striatal activity to correlate positively in the recurrent and in the open-ended  
session. The MNI peak coordinates and number of voxels in the cluster were respectively  
768  $[-12, 56, 20]$ ,  $T = 11.2$ , 901 voxels in the recurrent session, and  $[-12, 8, -12]$ ,  $T = 14.3$   
and 1419 voxels in the open-ended session.

770 We first investigated neural correlates of the trial-by-trial synaptic strength of chosen  
772 association in the associative network, at the onset decision ( $W_{chosen}$ ), and the neural  
correlates of the trial-by-trial inference signal strength from the task-set network to the  
774 associative network, at the onset feedback. Results are shown in Fig. S5.

## One-way ANOVA and second control ROI analysis

776 In order to test the hypothesis of a specific effect of task-set retrieval, we extract the betas  
from medial and lateral prefrontal nodes, and compare them from the two conditions: the  
778 recurrent and the open-ended session. This comparison is valid as soon as the region of  
interest is selected independently from the statistical maps of betas [Poldrack, 2007], i.e.  
780 the selected ROI need to be based on a different contrast than the one currently studied.  
We defined a functional network by the co-activations in both sessions, for the trial-  
782 by-trial task-set network inference signal to the associative network (ANOVA REC+OE  
for dorsomedial and dorsolateral prefrontal cortex, ANOVA -REC-OE for ventromedial  
784 prefrontal cortex, FWE 0.05, Table 7), which thus did not promote differences. Our ROI  
of ventromedial, dorsomedial and dorsolateral prefrontal cortex were selected from the  
786 obtained thresholded maps (FWE  $p = 0.05$ ) from this ANOVA analysis, and were used  
to test differences between REC and OE.

788 We further controlled our results by running other independent ROI analysis using :

- 790 • the Stanford Functional Imaging in Neuropsychiatric Disorders Lab [Shirer et al.,  
2012]
- the Glasser parcellation [Glasser et al., 2016]
- 792 • the Neurosynth meta-analysis [Yarkoni et al., 2011]
- the WFU PickAtlas [Lancaster et al., 2000; Lancaster, 1997; Maldjian et al., 2003]

794 Results are shown in Fig. S6.

## Software

796 All simulations were done with Python 2.7 (using numpy and scipy, and the scikit-learn  
package [Pedregosa et al., 2011]). The fMRI analysis was done with Matlab and SPM12  
798 [Ashburner et al., 2014].

## Supplemental Figures

### Model fitting and parameters in the two experiments, in the two sessions.

| Experiment/model                          | DF | AIC      | BIC      | $\alpha$     | $1/\beta$    | $\epsilon$    | QP           | JINC         |
|-------------------------------------------|----|----------|----------|--------------|--------------|---------------|--------------|--------------|
| <b>Experiment 1 (behavior only, N=22)</b> |    |          |          |              |              |               |              |              |
| AN, Recurrent session                     | 3  | 663 ± 12 | 671 ± 12 | 0.38 ± 0.007 | 0.15 ± 0.004 | 0.064 ± 0.004 |              |              |
| AN, Open-Ended session                    | 3  | 713 ± 14 | 720 ± 14 | 0.36 ± 0.007 | 0.15 ± 0.003 | 0.073 ± 0.004 |              |              |
| AN-TN, Recurrent session                  | 5  | 561 ± 17 | 573 ± 17 | 0.35 ± 0.007 | 0.16 ± 0.005 | 0.053 ± 0.004 | 0.17 ± 0.007 | 0.70 ± 0.037 |
| AN-TN, Open-Ended session                 | 5  | 687 ± 14 | 699 ± 14 | 0.34 ± 0.007 | 0.14 ± 0.002 | 0.072 ± 0.004 | 0.44 ± 0.015 | 0.16 ± 0.006 |
| <b>Experiment 2 (fMRI, N=40)</b>          |    |          |          |              |              |               |              |              |
| AN, Recurrent session                     | 3  | 664 ± 13 | 671 ± 13 | 0.38 ± 0.006 | 0.17 ± 0.003 | 0.083 ± 0.004 |              |              |
| AN, Open-Ended session                    | 3  | 726 ± 16 | 733 ± 16 | 0.38 ± 0.006 | 0.19 ± 0.005 | 0.086 ± 0.003 |              |              |
| AN-TN, Recurrent session                  | 5  | 599 ± 14 | 611 ± 14 | 0.35 ± 0.007 | 0.17 ± 0.003 | 0.068 ± 0.004 | 0.23 ± 0.015 | 0.57 ± 0.035 |
| AN-TN, Open-Ended session                 | 5  | 706 ± 16 | 718 ± 16 | 0.36 ± 0.007 | 0.17 ± 0.004 | 0.082 ± 0.003 | 0.38 ± 0.015 | 0.18 ± 0.015 |

Figure S1: The table summarizes the full network (AN-TN, with inference) and the associative network alone (AN, without inference) models fitting performances and average parameters. Related to Fig. 5. DF, degrees of freedom; AIC, Akaike information criterion; BIC, Bayesian information criterion;  $\alpha$ , learning rate in the AN;  $1/\beta$ , decision noise;  $\epsilon$ , uncertainty;  $Q_P$ , learning rate in the TN;  $J_{INC}$ , inference strength. All are expressed as mean  $\pm$  s.e.m.

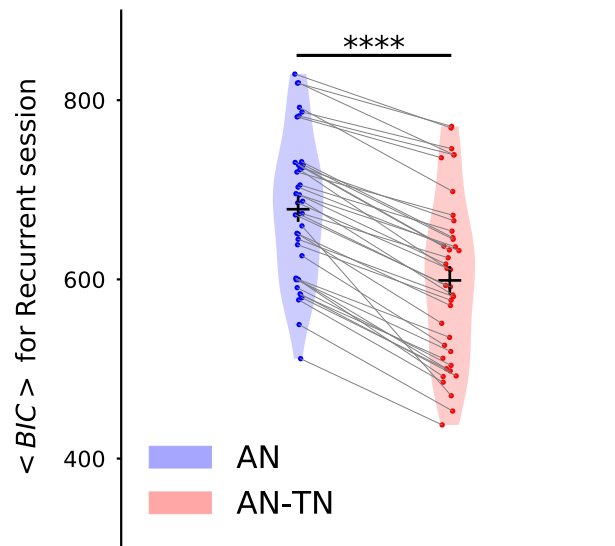

Figure S2: Model comparison for the recurrent session, for Experiment 2. Related to Fig. 5. Bayesian Information Criterion, computed as in [Bishop, 2007], for the models with and without task-set inference. The model provides a significantly better fit with inference than without ( $p = 9.1 \cdot 10^{-5}$ ,  $t = 4.1$ ).

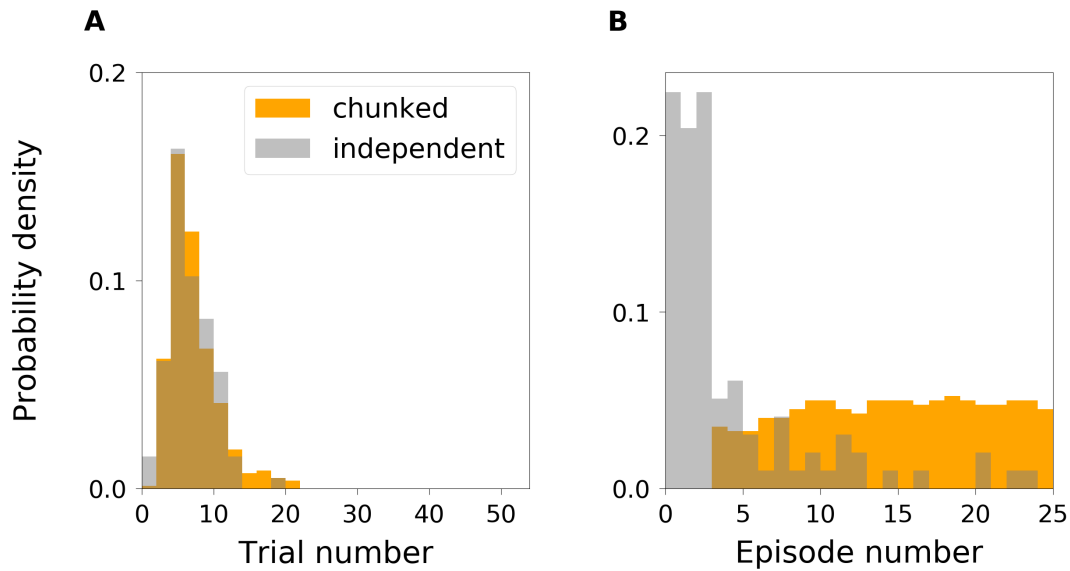

Figure S3: **Task-set retrieval prediction. Experiment 1.** Related to Fig. 6a,b,c. **a**, Distributions of trial numbering for the two categories of trials, chunked and independent. The distributions are not significantly different (a Kolmogorov-Smirnov test gives  $ks = 0.085$ ,  $p = 0.62$ ). **b**, Distributions of episode numbering for the two categories of trials, chunked and independent. We consider only one trial per episode. Generally, *independent* trials are from early episodes, and *chunked* trials are from late episodes, consistently with the expected learning progress.

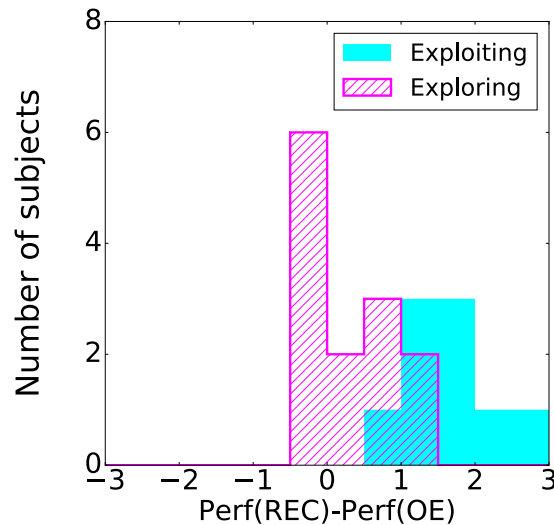

Figure S4: **Experiment 1 - Histograms over subjects of the difference of performance after 5 first consecutive correct trials, between the recurrent session and the open-ended session.** Related to Fig. 6. The classification of subjects is based on the model prediction. The difference between the two distributions is statistically significant (a Kolmogorov-Smirnov test gives  $p = 3 \cdot 10^{-4}$ )

| <b>Neural correlates of the trial-by-trial synaptic strength of the chosen association in the AN (<math>W_{chosen}</math>)</b> |                    |                  |                |                     |
|--------------------------------------------------------------------------------------------------------------------------------|--------------------|------------------|----------------|---------------------|
| <b>Contrast</b>                                                                                                                | <b>Label</b>       | <b>[ x y z ]</b> | <b>t-value</b> | <b>Cluster size</b> |
| REC                                                                                                                            | Striatum and vmPFC | [-8 52 -12]      | 7.9            | 145                 |
| OE                                                                                                                             | Striatum and vmPFC | [0 52 -12]       | 8.4            | 217                 |
| Negative REC                                                                                                                   | dACC and pre-SMA   | [4 20 48]        | 7.7            | 200                 |
|                                                                                                                                | right dlPFC        | [36 24 -8]       | 7.8            | 212                 |
|                                                                                                                                | left dlPFC         | [-32 20 4]       | 10.0           | 98                  |
| Negative OE                                                                                                                    | dACC and pre-SMA   | [0 28 44]        | 10.8           | 156                 |
|                                                                                                                                | right dlPFC        | [-32 24 -12]     | 9.1            | 62                  |
|                                                                                                                                | left dlPFC         | [-32 24 0]       | 8.0            | 49                  |
| <b>Neural correlates of the trial-by-trial inference signal strength (TN inference to AN)</b>                                  |                    |                  |                |                     |
| <b>Contrast</b>                                                                                                                | <b>Label</b>       | <b>[ x y z ]</b> | <b>t-value</b> | <b>Cluster size</b> |
| REC                                                                                                                            | dACC and pre-SMA   | [4 28 44]        | 8.9            | 93                  |
|                                                                                                                                | right dlPFC        | [52 20 40]       | 10.1           | 544                 |
|                                                                                                                                | left dlPFC         | [-40 52 -4]      | 7.8            | 74                  |
| Negative REC                                                                                                                   | vmPFC              | [-4 60 24]       | 8.5            | 95                  |

Figure S5: Neural correlates of the synaptic strength in the associative network, and of the inference from the task-set network to the associative network. **top**, Activations (FWE  $p = 0.05$ ) from the parametric modulator corresponding to the synaptic strength of the chosen association in the associative network,  $W_{chosen}$ , at the onset decision. **bottom**, Activations (FWE  $p = 0.05$ ) from the parametric modulator corresponding to the inference from the task-set network to the associative network, at the onset feedback. No activation (FWE  $p = 0.05$ ) was found in the open-ended session. dlPFC: dorsolateral prefrontal cortex; dmPFC: dorsomedial prefrontal cortex; vmPFC: ventromedial prefrontal cortex; [x y z] are MNI coordinates; REC: Recurrent session; OE: Open-Ended session.

| Statistical differences of activations in the two sessions for TN inference in independent ROIs for dorsolateral prefrontal cortex |         |                      |
|------------------------------------------------------------------------------------------------------------------------------------|---------|----------------------|
| ROI                                                                                                                                | t-value | p-value              |
| Stanford Functional Imaging in Neuropsychiatric Disorders Lab (Shirer et al., 2012)                                                | 4.4     | $3.8 \times 10^{-5}$ |
| Neurosynth (Yarkoni et al., 2011)                                                                                                  | 3.4     | $1.2 \times 10^{-3}$ |
| WFU PickAtlas, ROI of Brodmann 6, 8 and 9 (Lancaster et al., 2000; Maldjian et al., 2003)                                          | 2.4     | $1.8 \times 10^{-2}$ |
| WFU PickAtlas, ROI of Brodmann 44, 45, 46 (Lancaster et al., 2000; Maldjian et al., 2003)                                          | 2.9     | $4.4 \times 10^{-3}$ |
| Glasser Parcellation, dorsolateral PFC parcel (Glasser et al., 2016)                                                               | 3.0     | $3.6 \times 10^{-3}$ |
| Glasser Parcellation, parcel 8Av (Glasser et al., 2016)                                                                            | 3.9     | $1.8 \times 10^{-4}$ |
| Glasser Parcellation, parcel 8C (Glasser et al., 2016)                                                                             | 3.6     | $5.7 \times 10^{-4}$ |
| Glasser Parcellation, parcel p9-46v (Glasser et al., 2016)                                                                         | 4.0     | $1.3 \times 10^{-4}$ |
| Glasser Parcellation, parcel a9-46v (Glasser et al., 2016)                                                                         | 4.2     | $6.6 \times 10^{-5}$ |
| Glasser Parcellation, parcel 46 (Glasser et al., 2016)                                                                             | 2.0     | $4.5 \times 10^{-2}$ |
| Glasser Parcellation, parcel 9-46d (Glasser et al., 2016)                                                                          | 2.1     | $4.2 \times 10^{-2}$ |
| Glasser Parcellation, parcel i6-8 (Glasser et al., 2016)                                                                           | 4.2     | $7.5 \times 10^{-5}$ |
| Glasser Parcellation, parcel s6-8 (Glasser et al., 2016)                                                                           | 3.3     | $1.3 \times 10^{-3}$ |
|                                                                                                                                    |         |                      |
| Statistical differences of activations in the two sessions for TN inference in independent ROIs for dorsolateral prefrontal cortex |         |                      |
| ROI                                                                                                                                | t-value | p-value              |
| Glasser Parcellation, mPFC parcel 8BM (Glasser et al., 2016)                                                                       | 2.4     | $2.1 \times 10^{-2}$ |
| Glasser Parcellation, SMA parcel SCEF (Glasser et al., 2016)                                                                       | 2.0     | $4.7 \times 10^{-2}$ |
| Glasser Parcellation, SMA parcel 6ma (Glasser et al., 2016)                                                                        | 2.1     | $3.8 \times 10^{-2}$ |
| WFU PickAtlas, ROI of Brodmann 8 and 32 (Lancaster et al., 2000; Maldjian et al., 2003)                                            | 2.2     | $3.5 \times 10^{-2}$ |

Figure S6: Control independent ROI analysis: neural correlates of the inference signal from the task-set network to the associative network, at the onset feedback. **top**, Statistical difference between activations in the recurrent session and in the open-ended session, in independent ROIs for dorsolateral prefrontal cortex. **bottom**, Statistical difference between activations in the recurrent session and in the open-ended session, in independent ROIs for dorsomedial prefrontal cortex. dlPFC: dorsolateral prefrontal cortex; dmPFC: dorsomedial prefrontal cortex; vmPFC: ventromedial prefrontal cortex; [x y z] are MNI coordinates.

## References

- William H Alexander and Joshua W Brown. Medial prefrontal cortex as an action-outcome predictor. *Nature neuroscience*, 14(10):1338, 2011.
- Daniel J Amit and Stefano Fusi. Learning in neural networks with material synapses. *Neural Computation*, 6(5):957–982, 1994.
- Wael F Asaad, Gregor Rainer, and Earl K Miller. Neural activity in the primate prefrontal cortex during associative learning. *Neuron*, 21(6):1399–1407, 1998.
- John Ashburner, Gareth Barnes, C Chen, Jean Daunizeau, Guillaume Flandin, Karl Friston, Stefan Kiebel, James Kilner, Vladimir Litvak, Rosalyn Moran, et al. Spm12 manual. *Wellcome Trust Centre for Neuroimaging, London, UK*, 2014.
- Gary Aston-Jones and Jonathan D Cohen. Adaptive gain and the role of the locus coeruleus–norepinephrine system in optimal performance. *Journal of Comparative Neurology*, 493(1):99–110, 2005.
- David Badre. Cognitive control, hierarchy, and the rostro–caudal organization of the frontal lobes. *Trends in cognitive sciences*, 12(5):193–200, 2008.
- David Badre, Joshua Hoffman, Jeffrey W Cooney, and Mark D’Esposito. Hierarchical cognitive control deficits following damage to the human frontal lobe. *Nature neuroscience*, 12(4):515, 2009.
- David Badre, Andrew S Kayser, and Mark D’Esposito. Frontal cortex and the discovery of abstract action rules. *Neuron*, 66(2):315–326, 2010.
- Brice Bathellier, Sui Poh Tee, Christina Hrovat, and Simon Rumpel. A multiplicative reinforcement learning model capturing learning dynamics and interindividual variability in mice. *Proceedings of the National Academy of Sciences*, 110(49):19950–19955, 2013.
- Timothy EJ Behrens, Mark W Woolrich, Mark E Walton, and Matthew FS Rushworth. Learning the value of information in an uncertain world. *Nature neuroscience*, 10(9):1214–1221, 2007.
- Timothy EJ Behrens, Timothy H Muller, James CR Whittington, Shirley Mark, Alon B Baram, Kimberly L Stachenfeld, and Zeb Kurth-Nelson. What is a cognitive map? organizing knowledge for flexible behavior. *Neuron*, 100(2):490–509, 2018.
- C Bishop. *Pattern recognition and machine learning (information science and statistics)*, 1st edn. 2006. corr. 2nd printing edn, 2007.
- Barak Blumenfeld, Son Preminger, Dov Sagi, and Misha Tsodyks. Dynamics of memory representations in networks with novelty-facilitated synaptic plasticity. *Neuron*, 52(2):383–394, 2006.
- Matthew M Botvinick, Yael Niv, and Andrew C Barto. Hierarchically organized behavior and its neural foundations: a reinforcement learning perspective. *Cognition*, 113(3):262–280, 2009.
- Nicolas Brunel. Hebbian learning of context in recurrent neural networks. *Neural computation*, 8(8):1677–1710, 1996.



- Nicolas Brunel and Xiao-Jing Wang. Effects of neuromodulation in a cortical network model of object working memory dominated by recurrent inhibition. *Journal of computational neuroscience*, 11(1): 63–85, 2001.
- Vikram S Chib, Antonio Rangel, Shinsuke Shimojo, and John P O’Doherty. Evidence for a common representation of decision values for dissimilar goods in human ventromedial prefrontal cortex. *Journal of Neuroscience*, 29(39):12315–12320, 2009.
- Anne Collins and Etienne Koechlin. Reasoning, learning, and creativity: frontal lobe function and human decision-making. *PLoS biology*, 10(3):e1001293, 2012.
- Anne GE Collins and Michael J Frank. Cognitive control over learning: creating, clustering, and generalizing task-set structure. *Psychological review*, 120(1):190, 2013.
- Albert Compte, Nicolas Brunel, Patricia S Goldman-Rakic, and Xiao-Jing Wang. Synaptic mechanisms and network dynamics underlying spatial working memory in a cortical network model. *Cerebral Cortex*, 10(9):910–923, 2000.
- Aaron C Courville, Nathaniel D Daw, and David S Touretzky. Bayesian theories of conditioning in a changing world. *Trends in cognitive sciences*, 10(7):294–300, 2006.
- Clayton E Curtis and Daeyeol Lee. Beyond working memory: the role of persistent activity in decision making. *Trends in cognitive sciences*, 14(5):216–222, 2010.
- Nathaniel D Daw, Yael Niv, and Peter Dayan. Uncertainty-based competition between prefrontal and dorsolateral striatal systems for behavioral control. *Nature neuroscience*, 8(12):1704, 2005.
- Nathaniel D Daw, John P O’Doherty, Peter Dayan, Ben Seymour, and Raymond J Dolan. Cortical substrates for exploratory decisions in humans. *Nature*, 441(7095):876–879, 2006.
- Nathaniel D Daw, Samuel J Gershman, Ben Seymour, Peter Dayan, and Raymond J Dolan. Model-based influences on humans’ choices and striatal prediction errors. *Neuron*, 69(6):1204–1215, 2011.
- Peter Dayan and Nathaniel D Daw. Decision theory, reinforcement learning, and the brain. *Cognitive, Affective, & Behavioral Neuroscience*, 8(4):429–453, 2008.
- Maël Donoso, Anne GE Collins, and Etienne Koechlin. Foundations of human reasoning in the prefrontal cortex. *Science*, page 1252254, 2014.
- Nico UF Dosenbach, Kristina M Visscher, Erica D Palmer, Francis M Miezin, Kristin K Wenger, Hyunseon C Kang, E Darcy Burgund, Ansley L Grimes, Bradley L Schlaggar, and Steven E Petersen. A core system for the implementation of task sets. *Neuron*, 50(5):799–812, 2006.
- Kenji Doya. Metalearning and neuromodulation. *Neural Networks*, 15(4):495–506, 2002.
- Patrick J Drew and LF Abbott. Extending the effects of spike-timing-dependent plasticity to behavioral timescales. *Proceedings of the National Academy of Sciences*, 103(23):8876–8881, 2006.
- John Duncan. An adaptive coding model of neural function in prefrontal cortex. *Nature Reviews Neuroscience*, 2(11):820–829, 2001.



- Pierre Enel, Emmanuel Procyk, René Quilodran, and Peter Ford Dominey. Reservoir computing properties of neural dynamics in prefrontal cortex. *PLOS Comput Biol*, 12(6):e1004967, 2016.
- Shiva Farashahi, Christopher H Donahue, Peyman Khorsand, Hyojung Seo, Daeyeol Lee, and Alireza Soltani. Metaplasticity as a neural substrate for adaptive learning and choice under uncertainty. *Neuron*, 94(2):401–414, 2017.
- Nicholas T Franklin and Michael J Frank. Compositional clustering in task structure learning. *PLoS computational biology*, 14(4):e1006116, 2018.
- Yves Frégnac, Daniel Shulz, Simon Thorpe, and Elie Bienenstock. A cellular analogue of visual cortical plasticity. *Nature*, 333(6171):367–370, 1988.
- Stefano Fusi. Hebbian spike-driven synaptic plasticity for learning patterns of mean firing rates. *Biological cybernetics*, 87(5-6):459–470, 2002.
- Stefano Fusi, Wael F Asaad, Earl K Miller, and Xiao-Jing Wang. A neural circuit model of flexible sensorimotor mapping: learning and forgetting on multiple timescales. *Neuron*, 54(2):319–333, 2007.
- Stefano Fusi, Earl K Miller, and Mattia Rigotti. Why neurons mix: high dimensionality for higher cognition. *Current opinion in neurobiology*, 37:66–74, 2016.
- Aldo Genovesio, Peter J Brasted, Andrew R Mitz, and Steven P Wise. Prefrontal cortex activity related to abstract response strategies. *Neuron*, 47(2):307–320, 2005.
- Samuel J Gershman and Yael Niv. Exploring a latent cause theory of classical conditioning. *Learning & behavior*, 40(3):255–268, 2012.
- Matthew F Glasser, Timothy S Coalson, Emma C Robinson, Carl D Hacker, John Harwell, Essa Yacoub, Kamil Ugurbil, Jesper Andersson, Christian F Beckmann, Mark Jenkinson, et al. A multi-modal parcellation of human cerebral cortex. *Nature*, 536(7615):171–178, 2016.
- M Griniasty, MV Tsodyks, and Daniel J Amit. Conversion of temporal correlations between stimuli to spatial correlations between attractors. *Neural computation*, 5(1):1–17, 1993.
- Robert D Hawkins, Thomas W Abrams, Thomas J Carew, and Eric R Kandel. A cellular mechanism of classical conditioning in aplysia: activity-dependent amplification of presynaptic facilitation. *Science*, 219(4583):400–405, 1983.
- Donald Olding Hebb. *The organization of behavior: A neuropsychological theory*. Psychology Press, 1949.
- Andrew P Holmes and Karl J Friston. Generalisability, random effects & population inference. *Neuroimage*, 7, 1998.
- Michael J Kahana. Associative retrieval processes in free recall. *Memory & cognition*, 24(1):103–109, 1996.
- Adam Kepecs and Zachary F Mainen. A computational framework for the study of confidence in humans and animals. *Philosophical Transactions of the Royal Society of London B: Biological Sciences*, 367(1594):1322–1337, 2012.

- Mehdi Khamassi, Pierre Enel, Peter Ford Dominey, and Emmanuel Procyk. Medial prefrontal cortex and the adaptive regulation of reinforcement learning parameters. *Prog Brain Res*, 202:441–464, 2013.
- Hackjin Kim, Shinsuke Shimojo, and John P O’Doherty. Is avoiding an aversive outcome rewarding? neural substrates of avoidance learning in the human brain. *PLoS Biol*, 4(8):e233, 2006.
- Soyoun Kim, Jaewon Hwang, and Daeyeol Lee. Prefrontal coding of temporally discounted values during intertemporal choice. *Neuron*, 59(1):161–172, 2008.
- Etienne Koechlin and Alexandre Hyafil. Anterior prefrontal function and the limits of human decision-making. *Science*, 318(5850):594–598, 2007.
- Jack L Lancaster, Marty G Woldorff, Lawrence M Parsons, Mario Liotti, Catarina S Freitas, Lacy Rainey, Peter V Kochunov, Dan Nickerson, Shawn A Mikiten, and Peter T Fox. Automated talairach atlas labels for functional brain mapping. *Human brain mapping*, 10(3):120–131, 2000.
- JL Lancaster. The talairach daemon, a database server for talairach atlas labels. *Neuroimage*, 5:S633, 1997.
- Mael Lebreton and Stefano Palminteri. When are inter-individual brain-behavior correlations informative? *bioRxiv*, 2016.
- Maël Lebreton, Soledad Jorge, Vincent Michel, Bertrand Thirion, and Mathias Pessiglione. An automatic valuation system in the human brain: evidence from functional neuroimaging. *Neuron*, 64(3):431–439, 2009.
- WB Levy and O Steward. Temporal contiguity requirements for long-term associative potentiation/depression in the hippocampus. *Neuroscience*, 8(4):791–797, 1983.
- Nuo Li and James J DiCarlo. Unsupervised natural visual experience rapidly reshapes size-invariant object representation in inferior temporal cortex. *Neuron*, 67(6):1062–1075, 2010.
- Grace W Lindsay, Mattia Rigotti, Melissa R Warden, Earl K Miller, and Stefano Fusi. Hebbian learning in a random network captures selectivity properties of prefrontal cortex. *Journal of Neuroscience*, pages 1222–17, 2017.
- John Lisman. Long-term potentiation: outstanding questions and attempted synthesis. *Philosophical Transactions of the Royal Society of London B: Biological Sciences*, 358(1432):829–842, 2003.
- Gary S Lynch, Thomas Dunwiddie, and Valentin Gribkoff. Heterosynaptic depression: a postsynaptic correlate of long-term potentiation. 1977.
- Wei Ji Ma, Masud Husain, and Paul M Bays. Changing concepts of working memory. *Nature neuroscience*, 17(3):347, 2014.
- Colin M MacLeod. Half a century of research on the stroop effect: an integrative review. *Psychological bulletin*, 109(2):163, 1991.
- Joseph A Maldjian, Paul J Laurienti, Robert A Kraft, and Jonathan H Burdette. An automated method for neuroanatomic and cytoarchitectonic atlas-based interrogation of fmri data sets. *Neuroimage*, 19(3):1233–1239, 2003.

- Robert C Malenka and Roger A Nicoll. Long-term potentiation—a decade of progress? *Science*, 285(5435):1870–1874, 1999.
- Sanjay G Manohar, Nahid Zokaei, Sean J Fallon, Tim Vogels, and Masud Husain. Neural mechanisms of attending to items in working memory. *Neuroscience & Biobehavioral Reviews*, 2019.
- Earl K Miller. The prefrontal cortex and cognitive control. *Nature reviews neuroscience*, 1(1):59–65, 2000.
- Earl K Miller and Jonathan D Cohen. An integrative theory of prefrontal cortex function. *Annual review of neuroscience*, 24(1):167–202, 2001.
- John D Murray, Alberto Bernacchia, David J Freedman, Ranulfo Romo, Jonathan D Wallis, Xinying Cai, Camillo Padoa-Schioppa, Tatiana Pasternak, Hyojung Seo, Daeyeol Lee, et al. A hierarchy of intrinsic timescales across primate cortex. *Nature neuroscience*, 17(12):1661, 2014.
- John D Murray, Jorge Jaramillo, and Xiao-Jing Wang. Working memory and decision-making in a frontoparietal circuit model. *Journal of Neuroscience*, 37(50):12167–12186, 2017.
- Matthew R Nassar, Julie C Helmers, and Michael J Frank. Chunking as a rational strategy for lossy data compression in visual working memory. *Psychological review*, 125(4):486, 2018.
- Franz-Xaver Neubert, Rogier B Mars, Jérôme Sallet, and Matthew FS Rushworth. Connectivity reveals relationship of brain areas for reward-guided learning and decision making in human and monkey frontal cortex. *Proceedings of the national academy of sciences*, 112(20):E2695–E2704, 2015.
- Yael Niv. Reinforcement learning in the brain. *Journal of Mathematical Psychology*, 53(3):139–154, 2009.
- John O’Doherty, Peter Dayan, Johannes Schultz, Ralf Deichmann, Karl Friston, and Raymond J Dolan. Dissociable roles of ventral and dorsal striatum in instrumental conditioning. *science*, 304(5669):452–454, 2004.
- Srdjan Ostojic and Stefano Fusi. Synaptic encoding of temporal contiguity. *Frontiers in computational neuroscience*, 7, 2013.
- Randall C O’Reilly. The what and how of prefrontal cortical organization. *Trends in neurosciences*, 33(8):355–361, 2010.
- Stefano Palminteri, Mehdi Khamassi, Mateus Joffily, and Giorgio Coricelli. Contextual modulation of value signals in reward and punishment learning. *Nature communications*, 6:8096, 2015.
- Stefano Palminteri, Valentin Wyart, and Etienne Koechlin. The importance of falsification in computational cognitive modeling. *Trends in Cognitive Sciences*, 2017.
- Fabian Pedregosa, Gaël Varoquaux, Alexandre Gramfort, Vincent Michel, Bertrand Thirion, Olivier Grisel, Mathieu Blondel, Peter Prettenhofer, Ron Weiss, Vincent Dubourg, et al. Scikit-learn: Machine learning in python. *Journal of machine learning research*, 12(Oct):2825–2830, 2011.
- Russell A Poldrack. Region of interest analysis for fmri. *Social cognitive and affective neuroscience*, 2(1):67–70, 2007.

- Son Preminger, Barak Blumenfeld, Dov Sagi, and Misha Tsodyks. Mapping dynamic memories of gradually changing objects. *Proceedings of the National Academy of Sciences*, 106(13):5371–5376, 2009.
- Robert A Rescorla. Behavioral studies of pavlovian conditioning. *Annual review of neuroscience*, 11(1): 329–352, 1988.
- Robert A Rescorla, Allan R Wagner, et al. A theory of pavlovian conditioning: Variations in the effectiveness of reinforcement and nonreinforcement. *Classical conditioning II: Current research and theory*, 2:64–99, 1972.
- John NJ Reynolds, Brian I Hyland, and Jeffery R Wickens. A cellular mechanism of reward-related learning. *Nature*, 413(6851):67, 2001.
- Mattia Rigotti, Daniel D Ben Dayan Rubin, Xiao-Jing Wang, and Stefano Fusi. Internal representation of task rules by recurrent dynamics: the importance of the diversity of neural responses. *Frontiers in computational neuroscience*, 4:24, 2010a.
- Mattia Rigotti, Daniel Ben Dayan Rubin, Sara E Morrison, C Daniel Salzman, and Stefano Fusi. Attractor concretion as a mechanism for the formation of context representations. *Neuroimage*, 52(3): 833–847, 2010b.
- Mattia Rigotti, Omri Barak, Melissa R Warden, Xiao-Jing Wang, Nathaniel D Daw, Earl K Miller, and Stefano Fusi. The importance of mixed selectivity in complex cognitive tasks. *Nature*, 497(7451): 585–590, 2013.
- Mengia-S Rioult-Pedotti, Daniel Friedman, and John P Donoghue. Learning-induced ltp in neocortex. *Science*, 290(5491):533–536, 2000.
- Nicolas P Rougier, David C Noelle, Todd S Braver, Jonathan D Cohen, and Randall C O’Reilly. Prefrontal cortex and flexible cognitive control: Rules without symbols. *Proceedings of the National Academy of Sciences of the United States of America*, 102(20):7338–7343, 2005.
- Simon Rumpel, Joseph LeDoux, Anthony Zador, and Roberto Malinow. Postsynaptic receptor trafficking underlying a form of associative learning. *Science*, 308(5718):83–88, 2005.
- Matthew FS Rushworth and Timothy EJ Behrens. Choice, uncertainty and value in prefrontal and cingulate cortex. *Nature neuroscience*, 11(4):389, 2008.
- Matthew FS Rushworth, Mark J Buckley, Timothy EJ Behrens, Mark E Walton, and David M Bannerman. Functional organization of the medial frontal cortex. *Current opinion in neurobiology*, 17(2): 220–227, 2007.
- Evan M Russek, Ida Momennejad, Matthew M Botvinick, Samuel J Gershman, and Nathaniel D Daw. Predictive representations can link model-based reinforcement learning to model-free mechanisms. *PLoS computational biology*, 13(9):e1005768, 2017.
- Katsuyuki Sakai. Task set and prefrontal cortex. *Annu. Rev. Neurosci.*, 31:219–245, 2008.

- Kuniyoshi Sakai and Yasushi Miyashita. Neural organization for the long-term memory of paired associates. *Nature*, 354(6349):152–155, 1991.
- Susan J Sara. The locus coeruleus and noradrenergic modulation of cognition. *Nature reviews neuroscience*, 10(3):211–223, 2009.
- Wolfram Schultz and Anthony Dickinson. Neuronal coding of prediction errors. *Annual review of neuroscience*, 23(1):473–500, 2000.
- Amitai Shenhav, Matthew M Botvinick, and Jonathan D Cohen. The expected value of control: an integrative theory of anterior cingulate cortex function. *Neuron*, 79(2):217–240, 2013.
- Amitai Shenhav, Mark A Straccia, Jonathan D Cohen, and Matthew M Botvinick. Anterior cingulate engagement in a foraging context reflects choice difficulty, not foraging value. *Nature neuroscience*, 17(9):1249, 2014.
- WR Shirer, S Ryali, E Rykhlevskaia, V Menon, and MD Greicius. Decoding subject-driven cognitive states with whole-brain connectivity patterns. *Cerebral cortex*, 22(1):158–165, 2012.
- A Soltani, W Chaisangmongkon, and X-J Wang. Neural circuit mechanisms of value-based decision-making and reinforcement learning. In *Decision Neuroscience*, pages 163–176. Elsevier, 2017.
- Alireza Soltani and Alicia Izquierdo. Adaptive learning under expected and unexpected uncertainty. *Nature Reviews Neuroscience*, page 1, 2019.
- Alireza Soltani and Xiao-Jing Wang. A biophysically based neural model of matching law behavior: melioration by stochastic synapses. *Journal of Neuroscience*, 26(14):3731–3744, 2006.
- Alireza Soltani and Xiao-Jing Wang. Synaptic computation underlying probabilistic inference. *Nature neuroscience*, 13(1):112, 2010.
- J Ridley Stroop. Studies of interference in serial verbal reactions. *Journal of experimental psychology*, 18(6):643, 1935.
- Saori C Tanaka, Kenji Doya, Go Okada, Kazutaka Ueda, Yasumasa Okamoto, and Shigeto Yamawaki. Prediction of immediate and future rewards differentially recruits cortico-basal ganglia loops. *Nature neuroscience*, 7(8):887–893, 2004.
- Mark CW Van Rossum, Guo Qiang Bi, and Gina G Turrigiano. Stable hebbian learning from spike timing-dependent plasticity. *Journal of neuroscience*, 20(23):8812–8821, 2000.
- Guy Wallis, Edmund Rolls, and Peter Foldiak. Learning invariant responses to the natural transformations of objects. In *Neural Networks, 1993. IJCNN'93-Nagoya. Proceedings of 1993 International Joint Conference on*, volume 2, pages 1087–1090. IEEE, 1993.
- Jonathan D Wallis, Kathleen C Anderson, and Earl K Miller. Single neurons in prefrontal cortex encode abstract rules. *Nature*, 411(6840):953–956, 2001.
- Xiao-Jing Wang. Probabilistic decision making by slow reverberation in cortical circuits. *Neuron*, 36(5):955–968, 2002.

- Christopher JCH Watkins and Peter Dayan. Q-learning. *Machine learning*, 8(3-4):279–292, 1992.
- Robert C Wilson, Yuji K Takahashi, Geoffrey Schoenbaum, and Yael Niv. Orbitofrontal cortex as a cognitive map of task space. *Neuron*, 81(2):267–279, 2014.
- Kong-Fatt Wong and Xiao-Jing Wang. A recurrent network mechanism of time integration in perceptual decisions. *The Journal of neuroscience*, 26(4):1314–1328, 2006.
- Qiaojie Xiong, Petr Znamenskiy, and Anthony M Zador. Selective corticostriatal plasticity during acquisition of an auditory discrimination task. *Nature*, 521(7552):348, 2015.
- Volodya Yakovlev, Stefano Fusi, Elisha Berman, and Ehud Zohary. Inter-trial neuronal activity in inferior temporal cortex: a putative vehicle to generate long-term visual associations. *Nature neuroscience*, 1(4):310–317, 1998.
- Tal Yarkoni, Russell A Poldrack, Thomas E Nichols, David C Van Essen, and Tor D Wager. Large-scale automated synthesis of human functional neuroimaging data. *Nature methods*, 8(8):665–670, 2011.
- Angela Yu and Peter Dayan. Uncertainty, neuromodulation, and attention. *Neuron*, 46(4):681–692, 2005.
